# Supplementary material for: Virus-mediated transfer of nitrogen from heterotrophic bacteria to phytoplankton
Source: Copernicus journal article supplement (doi:10.5194/bg-15-809-2018), 2018-02-09
Supplement: Supplementary file 1 [file bg-15-809-2018-supplement.zip]

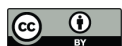

## *Supplement of*

# **Virus-mediated transfer of nitrogen from heterotrophic bacteria to phytoplankton**

**Emma J. Shelford and Curtis A. Suttle**

*Correspondence to:* Curtis A. Suttle ([suttle@science.ubc.ca](mailto:suttle@science.ubc.ca))

- [bg-15-809-2018-supplement-title-page.pdf](#)
- [Shelford and Suttle 2018-Lab Exp.xlsx](#)
- [Shelford and Suttle 2018-SB and JP Field Exp.xlsx](#)
- [Shelford and Suttle 2018-SI and FRP Field Data.xlsx](#)
- [Shelford and Suttle 2018-SI and FRP N-15 Data.xlsx](#)

The copyright of individual parts of the supplement might differ from the CC BY 4.0 License.
