# Supplementary material for: Virus-mediated transfer of nitrogen from heterotrophic bacteria to phytoplankton
Source: Copernicus journal article supplement (doi:10.5194/bg-15-809-2018), 2018-02-09
Supplement: Supplementary file 1 [file Shelford and Suttle 2018-Lab Exp.xlsx]

## Sheet: Info
			Time (d)
T0	2013-03-15	11am	0
T1	2013-03-16	11am	1
T2	2013-03-17	11am	2
T3	2013-03-18	11am	3
T4	2013-03-19	11am	4
T5	2013-03-20	11am	5

## Sheet: DC2
	Sample ID	Dilution factor	Acquisition time (min)	Sample volume (µl)	Flow mode	Flow rate (µl min-1)	HNA (events)	HNA (105 ml-1)	Sample ID
					High	72.4
pp.001	CHNR 1b t1	10	1	500	High	72.4	6017	8.31077	CHNR 1b t1				0	1	2	3	4	5	Increase							0	5
pp.002	CHNR 1b t1	10	1	500	High	72.4	5950	8.21823	CHNR 1b t1			1a	7.79972	9.28867	16.413	30.047	49.4351	51.1643	43.3646						1a	6.10718	40.0617
pp.003	CHNR 2b t1	10	1	500	High	72.4	6140	8.48066	CHNR 2b t1			1b	7.71823	8.21823	12.9392	20.9641	36.6409	50.1532	42.435						1b	6.04338	39.27
pp.004	CHNR 3b t1	10	1	500	High	72.4	5171	7.14227	CHNR 3b t1			1c	7.36878	8.3895	18.0663	32.5028	55.0939	58.383	51.0142						1c	5.76976	45.7139
pp.005	CHNR 4b t1	10	1	500	High	72.4	5092	7.03315	CHNR 4b t1			2a	8.20718	8.88536	12.4696	20.1575	30.1506	26.1852	17.9781						2a	6.42622	20.503
pp.006	CHNR 5b t1	10	1	500	High	72.4	0	0	CHNR 5b t1			2b	7.69475	8.48066		26.5483	34.2472	28.39	20.6952						2b	6.02499	22.2293
pp.007	CHNR 6b t1	10	1	500	High	72.4	0	0	CHNR 6b t1			2c	7.8674	7.49724	11.3826	17.5028	30.2196	33.3454	25.478						2c	6.16018	26.1095
pp.014	CHNR 1a t0	10	1	500	High	72.4	5647	7.79972	CHNR 1a t0			3a	7.67403	6.81906	7.79558	8.6395	13.9599	18.8635	11.1895	t=0	a	b	c		3a	6.00877	14.7701
pp.015	CHNR 1b t0	10	1	500	High	72.4	5588	7.71823	CHNR 1b t0			3b	7.56768	7.14227	7.76105	11.4765	18.0594	21.8719	14.3042	Syn+Bac+lysate	7.79972	7.71823	7.36878		3b	5.92549	17.1257
pp.016	CHNR 1c t0	10	1	500	High	72.4	5335	7.36878	CHNR 1c t0			3c	7.74033	6.99309		10.5318	16.1878	19.6866	11.9463	Syn+Bac	8.20718	7.69475	7.8674		3c	6.06068	15.4146
pp.017	CHNR 2a t0	10	1	500	High	72.4	5942	8.20718	CHNR 2a t0			4a	7.87431	7.63536	6.87983	6.66436	6.33978	7.55989	-0.314421	Syn+lysate	7.67403	7.56768	7.74033		4a	6.16558	5.91939
pp.018	CHNR 2b t0	10	1	500	High	72.4	5571	7.69475	CHNR 2b t0			4b	7.52901	7.03315	5.94337	5.32597	5.62431	6.10306	-1.42594	Syn	7.87431	7.52901	7.5442		4b	5.89521	4.7787
pp.019	CHNR 2c t0	10	1	500	High	72.4	5696	7.8674	CHNR 2c t0			4c	7.5442	7.22376	6.88536	7.03039	6.56768	7.12535	-0.418851						4c	5.90711	5.57915
pp.020	CHNR 3a t0	10	1	500	High	72.4	5556	7.67403	CHNR 3a t0																uM N in DC2
pp.021	CHNR 3b t0	10	1	500	High	72.4	5479	7.56768	CHNR 3b t0				0	1	2	3	4	5	Increase	t=5	a	b	c			T=0	T=end	T=0 sd	T=end sd
pp.022	CHNR 3c t0	10	1	500	High	72.4	5604	7.74033	CHNR 3c t0			Syn+Bac+lysate	7.62891	8.63214	15.8062	27.8379	47.0566	53.2335	45.6046	Syn+Bac+lysate	51.1643	50.1532	58.383		Syn+Bac+lysate	5.97344	41.6818	0.179255	3.51423
pp.023	CHNR 4a t0	10	1	500	High	72.4	5701	7.87431	CHNR 4a t0			Syn+Bac	7.92311	8.28775	11.9261	21.4029	31.5391	29.3069	21.3838	Syn+Bac	26.1852	28.39	33.3454		Syn+Bac	6.2038	22.9473	0.204142	2.87133
pp.024	CHNR 4a t0_2	10	1	500	High	72.4	5451	7.52901	CHNR 4a t0_2			Syn+lysate	7.66068	6.98481	7.77831	10.2159	16.0691	20.1407	12.48	Syn+lysate	18.8635	21.8719	19.6866		Syn+lysate	5.99831	15.7701	0.0681969	1.21735
pp.025	CHNR 4c t0	10	1	500	High	72.4	5462	7.5442	CHNR 4c t0			Syn	7.64917	7.29742	6.56952	6.34024	6.17726	6.92943	-0.719738	Syn	7.55989	6.10306	7.12535		Syn	5.9893	5.42575	0.152782	0.585615
pp.029	CHNR 1a t1	10	1	500	High	72.4	6725	9.28867	CHNR 1a t1				7.71547
pp.030	CHNR 1c t1	10	1	500	High	72.4	6074	8.3895	CHNR 1c t1
pp.031	CHNR 2a t1	10	1	500	High	72.4	6433	8.88536	CHNR 2a t1			DC2+Bac+Lys	0.132175	0.331971	1.51084	3.50928	5.45807	2.59124	49.4475	Anova: Single Factor for t=5								Anova: Single Factor for t=0
pp.032	CHNR 2c t1	10	1	500	High	72.4	5428	7.49724	CHNR 2c t1			DC2+Bac	0.150526	0.412161	0.443773	2.68445	1.3542	2.11719	2.29962
pp.033	CHNR 3a t1	10	1	500	High	72.4	4937	6.81906	CHNR 3a t1			DC2+Lys	0.0502854	0.093393	0.014097	0.834063	1.1849	0.89762	51.7472	SUMMARY								SUMMARY
pp.034	CHNR 3c t1	10	1	500	High	72.4	5063	6.99309	CHNR 3c t1			DC2	0.112654	0.177702	0.31308	0.518027	0.284193	0.431807		Groups	Count	Sum	Average	Variance				Groups	Count	Sum	Average	Variance
pp.035	CHNR 4a t1	10	1	500	High	72.4	5528	7.63536	CHNR 4a t1											DC2+Bac+Lys	3	159.701	53.2335	20.1435				DC2+Bac+Lys	3	22.8867	7.62891	0.0524105
pp.036	CHNR 4c t1	10	1	500	High	72.4	5230	7.22376	CHNR 4c t1											DC2+Bac	3	87.9206	29.3069	13.4475				DC2+Bac	3	23.7693	7.92311	0.067974
pp.037	CHNR 1a t2	10	1	500	High	72.4	11883	16.413	CHNR 1a t2											DC2+Lys	3	60.422	20.1407	2.41717				DC2+Lys	3	22.982	7.66068	0.00758587
pp.038	CHNR 1b t2	10	1	500	High	72.4	9368	12.9392	CHNR 1b t2											DC2	3	20.7883	6.92943	0.559371				DC2	3	22.9475	7.64917	0.0380731
pp.039	CHNR 1c t2	10	1	500	High	72.4	13080	18.0663	CHNR 1c t2
pp.040	CHNR 2a t2	10	1	500	High	72.4	9028	12.4696	CHNR 2a t2
pp.041	CHNR 2b t2	10	1	500	High	72.4	8241	11.3826	CHNR 2b t2											ANOVA								ANOVA
pp.042	CHNR 3a t2	10	1	500	High	72.4	5644	7.79558	CHNR 3a t2											Source of Variation	SS	df	MS	F	P-value	F crit		Source of Variation	SS	df	MS	F	P-value	F crit
pp.043	CHNR 3b t2	10	1	500	High	72.4	5619	7.76105	CHNR 3b t2											Between Groups	3428.25	3	1142.75	125.001	4.64503e-07	4.06618		Between Groups	0.174014	3	0.0580047	1.39734	0.312587	4.06618
pp.044	CHNR 4a t2	10	1	500	High	72.4	4981	6.87983	CHNR 4a t2											Within Groups	73.1352	8	9.1419					Within Groups	0.332087	8	0.0415109
pp.045	CHNR 4b t2	10	1	500	High	72.4	4303	5.94337	CHNR 4b t2
pp.046	CHNR 4c t2	10	1	500	High	72.4	4985	6.88536	CHNR 4c t2											Total	3501.38	11						Total	0.506101	11
pp.047	CHNR 1a t3	10	1	500	High	72.4	21754	30.047	CHNR 1a t3
pp.048	CHNR 1b t3	10	1	500	High	72.4	15178	20.9641	CHNR 1b t3
pp.049	CHNR 1c t3	10	1	500	High	72.4	23532	32.5028	CHNR 1c t3												So, there is a significant difference between treatments at t=5, but not at t=0.
pp.050	CHNR 2a t3	10	1	500	High	72.4	14594	20.1575	CHNR 2a t3
pp.051	CHNR 2b t3	10	1	500	High	72.4	19221	26.5483	CHNR 2b t3
pp.052	CHNR 2c t3	10	1	500	High	72.4	12672	17.5028	CHNR 2c t3											0.00284882
pp.053	CHNR 3a t3	10	1	500	High	72.4	6255	8.6395	CHNR 3a t3
pp.054	CHNR 3b t3	10	1	500	High	72.4	8309	11.4765	CHNR 3b t3
pp.055	CHNR 3c t3	10	1	500	High	72.4	7625	10.5318	CHNR 3c t3
pp.056	CHNR 4a t3	10	1	500	High	72.4	4825	6.66436	CHNR 4a t3
pp.057	CHNR 4b t3	10	1	500	High	72.4	3856	5.32597	CHNR 4b t3
pp.058	CHNR 4c t3	10	1	500	High	72.4	5090	7.03039	CHNR 4c t3
pp.059	CHNR 1a t4	10	1	500	High	72.4	35791	49.4351	CHNR 1a t4												Increase
pp.060	CHNR 1b t4	10	1	500	High	72.4	26528	36.6409	CHNR 1b t4											1a	43.3646
pp.061	CHNR 1c t4	10	1	500	High	72.4	39888	55.0939	CHNR 1c t4											1b	42.435
pp.062	CHNR 2a t4	10	1	500	High	72.4	21829	30.1506	CHNR 2a t4											1c	51.0142
pp.063	CHNR 2b t4	10	1	500	High	72.4	24795	34.2472	CHNR 2b t4											2a	17.9781
pp.064	CHNR 2c t4	10	1	500	High	72.4	21879	30.2196	CHNR 2c t4											2b	20.6952
pp.065	CHNR 3a t4	10	1	500	High	72.4	10107	13.9599	CHNR 3a t4											2c	25.478
pp.066	CHNR 3b t4	10	1	500	High	72.4	13075	18.0594	CHNR 3b t4											3a	11.1895
pp.067	CHNR 3c t4	10	1	500	High	72.4	11720	16.1878	CHNR 3c t4											3b	14.3042
pp.068	CHNR 4a t4	10	1	500	High	72.4	4590	6.33978	CHNR 4a t4											3c	11.9463
pp.069	CHNR 4b t4	10	1	500	High	72.4	4072	5.62431	CHNR 4b t4
pp.070	CHNR 4c t4	10	1	500	High	72.4	4755	6.56768	CHNR 4c t4												Average	StDev
																				DC2+Bac+Lys	45.6046	4.70787
		10	1	500	High	71.8	36736	51.1643	CHNR 1a t5											DC2+Bac	21.3838	3.79709
		10	1	500	High	71.8	36010	50.1532	CHNR 1b t5											DC2+Lys	12.48	1.62449
		10	1	500	High	71.8	41919	58.383	CHNR 1c t5
		10	1	500	High	71.8	18801	26.1852	CHNR 2a t5											DC2+Bac+Lys	45.6046	4.70787
		10	1	500	High	71.8	20384	28.39	CHNR 2b t5											DC2+Bac and DC2+Lys	33.8637	4.12999
		10	1	500	High	71.8	23942	33.3454	CHNR 2c t5
		10	1	500	High	71.8	13544	18.8635	CHNR 3a t5
		10	1	500	High	71.8	15704	21.8719	CHNR 3b t5												DC2+Bac+Lys	DC2+Bac	DC2+Lys
		10	1	500	High	71.8	14135	19.6866	CHNR 3c t5												45.6046
		10	1	500	High	71.8	5428	7.55989	CHNR 4a t5													21.3838	12.48
		10	1	500	High	71.8	4382	6.10306	CHNR 4b t5
		10	1	500	High	71.8	5116	7.12535	CHNR 4c t5												DC2+Bac+Lys	DC2+Bac	DC2+Lys
		10	1	500	High	71.8	35127	48.9234	Test 1a											uM N in DC2	35.7084
		10	1	500	High	71.8	37030	51.5738	Test 1a+P					t4	t5	-P	+P					16.7435	9.77183		12.48	1.62449	x10^8 cell/L
		10	1	500	High	71.8	20328	28.312	Test 2a				1a	49.4351	51.1643	48.9234	51.5738								9.77183	1.27198	uM N in DC2 from Lys
		10	1	500	High	71.8	21207	29.5362	Test 2a+P				2a	30.1506	26.1852	28.312	29.5362			stdev	3.68626
		10	1	500	High	71.8	10006	13.9359	Test3a				3a	13.9599	18.8635	13.9359	13.9582					2.97312	1.27198
		10	1	500	High	71.8	10022	13.9582	Test 3a+P				4a	6.33978	7.55989	6.1337	5.99304
		10	1	500	High	71.8	4404	6.1337	Test 4a
		10	1	500	High	71.8	4303	5.99304	Test 4a+P

## Sheet: Bac
					Sample ID	Dilution factor	Acquisition time (min)	Sample volume (µl)	SYBR Green (µl)	Total volume (µl)	Flow mode	Flow rate (µl min-1)	HNA (events)	HNA (105 ml-1)	Sample ID
2013-02-20											Med	50.5
bac.001											Med	50.5
bac.002				bac.017	CHNR 1a t1	100	1	500	10	510	Med	50.5	3206	64.7549	CHNR 1a t1
bac.003				bac.018	CHNR 1c t1	100	1	500	10	510	Med	50.5	2600	52.5149	CHNR 1c t1			CHNR 6abc t5 was done improperly. What I suspect happened was that I put in 2x 50ul into the 100x tube by accident.
bac.004				bac.019	CHNR 2a t1	10	1	500	10	510	Med	50.5	14287	28.8569	CHNR 2a t1			So I've adjusted those values accordingly.
bac.005				bac.020	CHNR 2c t1	10	1	500	10	510	Med	50.5	13460	27.1865	CHNR 2c t1			I tested the 6 t5 samples two days later, and they confirmed this theory.
bac.006				bac.021	CHNR 3a t1	100	1	500	10	510	Med	50.5	2689	54.3125	CHNR 3a t1
bac.007				bac.022	CHNR 3c t1	100	1	500	10	510	Med	50.5	2683	54.1913	CHNR 3c t1
bac.008				bac.023	CHNR 4a t1	10	1	500	10	510	Med	50.5	14179	28.6388	CHNR 4a t1
bac.009				bac.024	CHNR 4c t1	10	1	500	10	510	Med	50.5	13930	28.1358	CHNR 4c t1
bac.010				bac.025	CHNR 5a t1	10	1	500	10	510	Med	50.5	2512	5.07374	CHNR 5a t1
bac.011				bac.026	CHNR 5c t1	10	1	500	10	510	Med	50.5	2471	4.99093	CHNR 5c t1
bac.012				bac.027	CHNR 6a t1	10	1	500	10	510	Med	50.5	7761	15.6757	CHNR 6a t1
bac.013				bac.028	CHNR 6c t1	10	1	500	10	510	Med	50.5	7616	15.3828	CHNR 6c t1
bac.014				bac.029	CHNR 1a t1	10	1	500	10	510	Med	50.5	29329	59.2388	CHNR 1a t1
bac.015				bac.030	CHNR 1c t1	10	1	500	10	510	Med	50.5	22155	44.7487	CHNR 1c t1
bac.016				bac.031	CHNR 3a t1	10	1	500	10	510	Med	50.5	23105	46.6675	CHNR 3a t1
bac.017				bac.032	CHNR 3c t1	10	1	500	10	510	Med	50.5	23969	48.4126	CHNR 3c t1
bac.018				bac.033	CHNR 6a t1	100	1	500	10	510	Med	50.5	779	15.7343	CHNR 6a t1		Bacteria counts								Bacteria counts in unstained samples (pp)								Bacteria counts corrected for pp in unstained samples
bac.019				bac.034	CHNR 6c t1	100	1	500	10	510	Med	50.5	810	16.3604	CHNR 6c t1			0	1	2	3	4	5			0	1	2	3	4	5		10^5/ml	0	1	2	3	4	5	Increase	t=5	a	b	c				t=0	a
bac.020				bac.050	CHNR 1a t2	100	1	500	10	510	Med	50.5	4151	83.842	CHNR 1a t2		1a	20.6349	64.7549	83.842	110.84	119.471	138.988		1a	3.14343	6.95644	16.301	9.59596	10.9842	1.59798		1a	17.4915	57.7984	67.541	101.244	108.487	137.39	119.898	Syn+Bac+lysate	137.39	134.362	137.082				Syn+Bac+lysate	17.4915
bac.021				bac.051	CHNR 1b t2	100	1	500	10	510	Med	50.5	4504	90.9719	CHNR 1b t2		1b	20.4783		90.9719	96.2509	115.674	136.247		1b	1.91919		2.40594	3.89899	4.97426	1.88485		1b	18.5591	0	88.5659	92.3519	110.7	134.362	115.803	Syn+Bac	62.4592	64.0383	64.1325				Syn+Bac	19.6585
bac.022				bac.052	CHNR 1c t2	100	1	500	10	510	Med	50.5	4090	82.6099	CHNR 1c t2		1c	20.3794	52.5149	82.6099	105.792	126.541	138.102		1c	1.29091	0.70297	1.72277	2.67273	3.25941	1.0202		1c	19.0885	51.8119	80.8871	103.119	123.281	137.082	117.993	Syn+lysate	103.926	104.154	98.8242				Syn+lysate	16.0254
bac.023				bac.053	CHNR 2a t2	10	1	500	10	510	Med	50.5	18369	37.1017	CHNR 2a t2		2a	20.604	28.8569	37.1017	60.2501	64.2216	62.9824		2a	0.945455	1.9604	0.576238	1.34949	1.61584	0.523232		2a	19.6585	26.8965	36.5255	58.9006	62.6058	62.4592	42.8006	Syn	44.5441	35.5606	45.8878				Syn	16.47
bac.024				bac.054	CHNR 2c t2	10	1	500	10	510	Med	50.5	16321	32.9652	CHNR 2c t2		2b	20.6596		41.3393	59.4052	68.9379	64.3898		2b	0.632323		0.394059	0.927273	0.875248	0.351515		2b	20.0273	0	40.9452	58.4779	68.0626	64.0383	44.011	Bac	13.0065	10.404	10.6781				Bac	3.96667
bac.025				bac.055	CHNR 2b t2	10	1	500	10	510	Med	50.5	5964	12.0461	CHNR 2b t2		2c	20.6452	27.1865	32.9652	44.1279	59.3842	64.3527		2c	0.612121	0.10297	0.271287	0.721212	0.427723	0.220202		2c	20.0331	27.0836	32.6939	43.4067	58.9565	64.1325	44.0994	Bac+lysate	129.12	131.36	134.3				Bac+lysate	4.27988
bac.026				bac.056	CHNR 3a t2	100	1	500	10	510	Med	50.5	3528	71.2586	CHNR 3a t2		3a	16.5425	54.3125	71.2586	84.8764	94.6075	104.844		3a	0.517172	1.52871	0.407921	0.787879	0.621782	0.917172		3a	16.0254	52.7838	70.8507	84.0885	93.9857	103.926	87.9011
bac.027				bac.057	CHNR 3b t2	100	1	500	10	510	Med	50.5	3520	71.097	CHNR 3b t2		3b	16.3447		71.097	88.8739	103.111	104.782		3b	0.40404		0.394059	0.983838	0.564356	0.628283		3b	15.9407	0	70.703	87.8901	102.547	104.154	88.2128
bac.028				bac.058	CHNR 3c t2	100	1	500	10	510	Med	50.5	3310	66.8554	CHNR 3c t2		3c	17.1793	54.1913	66.8554	82.8364	92.4059	99.4242		3c	0.327273	0.0772277	0.279208	0.840404	0.362376	0.6		3c	16.852	54.1141	66.5762	81.996	92.0436	98.8242	81.9722		Anova: Single Factor for t=5							Anova: Single Factor for t=0 (all)
bac.029				bac.059	CHNR 4a t2	10	1	500	10	510	Med	50.5	18448	37.2613	CHNR 4a t2		4a	16.7589	28.6388	37.2613	41.1977	42.5653	44.7502		4a	0.288889	0.213861	0.170297	0.260606	0.213861	0.206061		4a	16.47	28.4249	37.091	40.9371	42.3514	44.5441	28.0741
bac.030				bac.060	CHNR 4b t2	10	1	500	10	510	Med	50.5	15770	31.8523	CHNR 4b t2		4b	16.8001		31.8523	33.0377	33.4439	35.803		4b	0.30101		0.134653	0.19798	0.0891089	0.242424		4b	16.4991	0	31.7176	32.8397	33.3548	35.5606	19.0615		SUMMARY							SUMMARY
bac.031				bac.061	CHNR 4c t2	10	1	500	10	510	Med	50.5	17391	35.1264	CHNR 4c t2		4c	16.965	28.1358	35.1264	42.0817	42.9612	46.104		4c	0.254545	0.0435644	0.0772277	0.189899	0.178218	0.216162		4c	16.7104	28.0923	35.0491	41.8918	42.783	45.8878	29.1774		Groups	Count	Sum	Average	Variance			Groups
bac.032				bac.062	CHNR 5a t2	10	1	500	10	510	Med	50.5	4263	8.61042	CHNR 5a t2		5a	3.96667	5.07374	8.61042	11.3663	12.2461	13.0065										5a	3.96667	5.07374	8.61042	11.3663	12.2461	13.0065	9.03988		DC2+Bac+Lys	3	408.834	136.278	2.77577			DC2+Bac+Lys
bac.033				bac.063	CHNR 5b t2	10	1	500	10	510	Med	50.5	3747	7.5682	CHNR 5b t2		5b	4.24485		7.5682	8.74109	9.53145	10.404										5b	4.24485	0	7.5682	8.74109	9.53145	10.404	6.15915		DC2+Bac	3	190.63	63.5433	0.883752			DC2+Bac
bac.034				bac.064	CHNR 5c t2	10	1	500	10	510	Med	50.5	3855	7.78634	CHNR 5c t2		5c	4.32727	4.99093	7.78634	9.08109	9.50115	10.6781										5c	4.32727	4.99093	7.78634	9.08109	9.50115	10.6781	6.35079		DC2+Lys	3	306.904	102.301	9.08093			DC2+Lys
bac.035				bac.065	CHNR 6a t2	10	1	500	10	510	Med	50.5	60263	121.719	CHNR 6a t2		6a	4.27988	15.6757	121.719	139.029	130.444	129.12										6a	4.27988	15.6757	121.719	139.029	130.444	129.12	124.84		DC2	3	125.993	41.9975	31.5268			DC2
bac.036				bac.066	CHNR 6b t2	10	1	500	10	510	Med	50.5	59995	121.178	CHNR 6b t2		6b	4.20364		121.178	138.081	137.38	131.36										6b	4.20364	0	121.178	138.081	137.38	131.36	127.156		Bac	3	34.0886	11.3629	2.04503			Bac
bac.037				bac.067	CHNR 6c t2	10	1	500	10	510	Med	50.5	60984	123.176	CHNR 6c t2		6c	4.26339	15.3828	123.176	143.583	137.76	134.3										6c	4.26339	15.3828	123.176	143.583	137.76	134.3	130.037		Bac+Lys	3	3947.79	1315.93	674.995			Bac+Lys
bac.038				bac.068	CHNR 2b t2	10	1	500	10	510	Med	50.5	20467	41.3393	CHNR 2b t2
bac.039				bac.081	CHNR 1a t4	100	1	500	10	510	Med	50.5	5915	119.471	CHNR 1a t4
bac.040				bac.082	CHNR 1b t4	100	1	500	10	510	Med	50.5	5727	115.674	CHNR 1b t4		Bac conc. In UF:																10^6/ml	0	1	2	3	4	5	Increase		ANOVA							ANOVA
bac.041				bac.083	CHNR 1c t4	100	1	500	10	510	Med	50.5	6265	126.541	CHNR 1c t4			4.1796	x10^5 cells/ml													Average	Syn+Bac+lysate	1.83797	3.65368	7.8998	9.89049	11.4156	13.6278	11.7898		Source of Variation	SS	df	MS	F	P-value	F crit	Source of Variation
bac.042				bac.084	CHNR 2a t4	10	1	500	10	510	Med	50.5	31796	64.2216	CHNR 2a t4																		Syn+Bac	1.99063	1.79934	3.67215	5.35951	6.32083	6.35433	4.3637		Between Groups	3.90311e+06	5	780622	6493.4	3.72813e-20	3.10588	Between Groups
bac.043				bac.085	CHNR 2b t4	10	1	500	10	510	Med	50.5	34131	68.9379	CHNR 2b t4																		Syn+lysate	1.62727	3.56326	6.93766	8.46582	9.61919	10.2301	8.60287		Within Groups	1442.61	12	120.218				Within Groups
bac.044				bac.086	CHNR 2c t4	10	1	500	10	510	Med	50.5	29401	59.3842	CHNR 2c t4																		Syn	1.65599	1.88391	3.46193	3.85562	3.94964	4.19975	2.54377
bac.045				bac.087	CHNR 3a t4	100	1	500	10	510	Med	50.5	4684	94.6075	CHNR 3a t4																		Bac	0.41796	0.335489	0.798832	0.972949	1.04262	1.13629	0.718327		Total	3.90455e+06	17					Total
bac.046				bac.088	CHNR 3b t4	100	1	500	10	510	Med	50.5	5105	103.111	CHNR 3b t4																		Bac+lysate	0.424897	1.03528	12.2024	14.0231	13.5195	13.1593	12.7344
bac.047				bac.089	CHNR 3c t4	100	1	500	10	510	Med	50.5	4575	92.4059	CHNR 3c t4
bac.048				bac.090	CHNR 4a t4	10	1	500	10	510	Med	50.5	21074	42.5653	CHNR 4a t4																	StDev	DC2+Bac+Lys	0.0469664	1.83499	0.614244	0.332089	0.460707	0.0961903			So there are significant differences between treatments at T=5. There are differences at T=0 also, but that is treatment dependent (expected).
bac.061				bac.091	CHNR 4b t4	10	1	500	10	510	Med	50.5	16558	33.4439	CHNR 4b t4																		DC2+Bac	0.0123897	0.899684	0.238397	0.509566	0.264592	0.0542756
bac.062				bac.092	CHNR 4c t4	10	1	500	10	510	Med	50.5	21270	42.9612	CHNR 4c t4																		DC2+Lys	0.0290686	1.78204	0.140085	0.172517	0.322638	0.173982
bac.063				bac.093	CHNR 5a t4	10	1	500	10	510	Med	50.5	6063	12.2461	CHNR 5a t4																		DC2	0.00757531	0.942002	0.156598	0.28715	0.307334	0.324175
bac.064				bac.094	CHNR 5b t4	10	1	500	10	510	Med	50.5	4719	9.53145	CHNR 5b t4																		Bac	0.0109091	0.167762	0.031736	0.0824268	0.0909963	0.0825638
bac.065				bac.095	CHNR 5c t4	10	1	500	10	510	Med	50.5	4704	9.50115	CHNR 5c t4																		Bac+Lys	0.00231608	0.517711	0.0596476	0.169815	0.237786	0.149999
bac.066				bac.096	CHNR 6a t4	20	1	1000	10	1010	Med	50.5	32611	130.444	CHNR 6a t4
bac.067				bac.097	CHNR 6b t4	20	1	1000	10	1010	Med	50.5	34345	137.38	CHNR 6b t4
bac.068				bac.098	CHNR 6c t4	20	1	1000	10	1010	Med	50.5	34440	137.76	CHNR 6c t4
bac.069				pp.001	CHNR 1a t1	10	1	500	0	500	Med	50.5	141	0.279208	CHNR 1a t1
bac.070				pp.002	CHNR 1a t1	10	1	500	0	500	Med	50.5	3513	6.95644	CHNR 1a t1
bac.071				pp.003	CHNR 1c t1	10	1	500	0	500	Med	50.5	355	0.70297	CHNR 1c t1
bac.072				pp.004	CHNR 1c t1	10	1	500	0	500	Med	50.5	263	0.520792	CHNR 1c t1
bac.085				pp.005	CHNR 2a t1	10	1	500	0	500	Med	50.5	0	0	CHNR 2a t1
bac.086				pp.006	CHNR 2a t1	10	1	500	0	500	Med	50.5	990	1.9604	CHNR 2a t1
bac.087				pp.007	CHNR 2c t1	10	1	500	0	500	Med	50.5	52	0.10297	CHNR 2c t1
bac.088				pp.008	CHNR 2c t1	10	1	500	0	500	Med	50.5	5	0.00990099	CHNR 2c t1
bac.089				pp.009	CHNR 3a t1	10	1	500	0	500	Med	50.5	4	0.00792079	CHNR 3a t1
bac.090				pp.010	CHNR 3a t1	10	1	500	0	500	Med	50.5	772	1.52871	CHNR 3a t1
bac.091				pp.011	CHNR 3c t1	10	1	500	0	500	Med	50.5	39	0.0772277	CHNR 3c t1
bac.092				pp.012	CHNR 3c t1	10	1	500	0	500	Med	50.5	27	0.0534653	CHNR 3c t1
bac.093				pp.013	CHNR 4a t1	10	1	500	0	500	Med	50.5	0	0	CHNR 4a t1
bac.094				pp.014	CHNR 4a t1	10	1	500	0	500	Med	50.5	108	0.213861	CHNR 4a t1
bac.095				pp.015	CHNR 4c t1	10	1	500	0	500	Med	50.5	22	0.0435644	CHNR 4c t1																											uM N in Bac
bac.096				pp.016	CHNR 4c t1	10	1	500	0	500	Med	50.5	0	0	CHNR 4c t1																												T=0	T=end	T=0 sd	T=end sd
				pp.035	CHNR2b t2 pp	10	1	500	0	500	Med	50.5	115	0.227723	CHNR2b t2 pp																											Syn+Bac+lysate	0.0760919	0.564191	0.00194441	0.00398228
				pp.036	CHNR 3c t2 pp	10	1	500	0	500	Med	50.5	170	0.336634	CHNR 3c t2 pp																											Syn+Bac	0.0824122	0.263069	0.000512933	0.00224701
				pp.037	CHNR 1a t2	10	1	500	0	500	Med	50.5	89	0.176238	CHNR 1a t2																											Syn+lysate	0.0673689	0.423528	0.00120344	0.00720286
				pp.038	CHNR 1a t2	10	1	500	0	500	Med	50.5	8232	16.301	CHNR 1a t2																											Syn	0.0685578	0.17387	0.000313618	0.0134208
				pp.039	CHNR 1b t2	10	1	500	0	500	Med	50.5	1215	2.40594	CHNR 1b t2																											Bac	0.0173035	0.0470423	0.000451637	0.00341814
				pp.040	CHNR 1c t2	10	1	500	0	500	Med	50.5	870	1.72277	CHNR 1c t2																											Bac+lysate	0.0175907	0.544795	9.58858e-05	0.00620998
				pp.041	CHNR 2a t2	10	1	500	0	500	Med	50.5	291	0.576238	CHNR 2a t2
				pp.042	CHNR 2b t2	10	1	500	0	500	Med	50.5	199	0.394059	CHNR 2b t2
				pp.043	CHNR 2c t2	10	1	500	0	500	Med	50.5	137	0.271287	CHNR 2c t2
				pp.044	CHNR 3a t2	10	1	500	0	500	Med	50.5	206	0.407921	CHNR 3a t2
				pp.045	CHNR 3b t2	10	1	500	0	500	Med	50.5	199	0.394059	CHNR 3b t2
				pp.046	CHNR 3c t2	10	1	500	0	500	Med	50.5	141	0.279208	CHNR 3c t2
				pp.047	CHNR 4a t2	10	1	500	0	500	Med	50.5	86	0.170297	CHNR 4a t2
				pp.048	CHNR 4b t2	10	1	500	0	500	Med	50.5	68	0.134653	CHNR 4b t2
				pp.049	CHNR 4c t2	10	1	500	0	500	Med	50.5	39	0.0772277	CHNR 4c t2
				pp.069	CHNR 1a t4	10	1	500	0	500	Med	50.5	5547	10.9842	CHNR 1a t4
				pp.070	CHNR 1b t4	10	1	500	0	500	Med	50.5	2512	4.97426	CHNR 1b t4
				pp.071	CHNR 1c t4	10	1	500	0	500	Med	50.5	1646	3.25941	CHNR 1c t4
				pp.072	CHNR 2a t4	10	1	500	0	500	Med	50.5	816	1.61584	CHNR 2a t4
				pp.073	CHNR 2b t4	10	1	500	0	500	Med	50.5	442	0.875248	CHNR 2b t4
				pp.074	CHNR 2c t4	10	1	500	0	500	Med	50.5	216	0.427723	CHNR 2c t4
				pp.075	CHNR 3a t4	10	1	500	0	500	Med	50.5	314	0.621782	CHNR 3a t4
				pp.076	CHNR 3b t4	10	1	500	0	500	Med	50.5	285	0.564356	CHNR 3b t4
				pp.077	CHNR 3c t4	10	1	500	0	500	Med	50.5	183	0.362376	CHNR 3c t4
				pp.078	CHNR 4a t4	10	1	500	0	500	Med	50.5	108	0.213861	CHNR 4a t4
				pp.079	CHNR 4b t4	10	1	500	0	500	Med	50.5	45	0.0891089	CHNR 4b t4
				pp.080	CHNR 4c t4	10	1	500	0	500	Med	50.5	90	0.178218	CHNR 4c t4
				bac.019	PWH3a-P1 T=0 14Mar13	10000	1	500	10	510	High	74.5	2855	3908.86	PWH3a-P1 T=0 14Mar13			3.95698e+08
				bac.020	PWH3a-P1 T=0 14Mar13	1000	1	500	10	510	High	74.5	29253	4005.11	PWH3a-P1 T=0 14Mar13
				vir.003	PWH3a-P1 T=end	1000	1	500	10	510	Med	51.2	5621	1119.81	PWH3a-P1 T=end
				bac.001	CHNR 1a t3	100	1	500	10	510	Med	49.5	5379	110.84	CHNR 1a t3
				bac.002	CHNR 1b t3	100	1	500	10	510	Med	49.5	4671	96.2509	CHNR 1b t3
				bac.003	CHNR 1c t3	100	1	500	10	510	Med	49.5	5134	105.792	CHNR 1c t3
				bac.004	CHNR 2a t3	10	1	500	10	510	Med	49.5	29239	60.2501	CHNR 2a t3
				bac.005	CHNR 2b t3	10	1	500	10	510	Med	49.5	28829	59.4052	CHNR 2b t3
				bac.006	CHNR 2c t3	10	1	500	10	510	Med	49.5	21415	44.1279	CHNR 2c t3
				bac.007	CHNR 3a t3	100	1	500	10	510	Med	49.5	4119	84.8764	CHNR 3a t3
				bac.008	CHNR 3b t3	100	1	500	10	510	Med	49.5	4313	88.8739	CHNR 3b t3
				bac.009	CHNR 3c t3	100	1	500	10	510	Med	49.5	4020	82.8364	CHNR 3c t3
				bac.010	CHNR 4a t3	10	1	500	10	510	Med	49.5	19993	41.1977	CHNR 4a t3
				bac.011	CHNR 4b t3	10	1	500	10	510	Med	49.5	16033	33.0377	CHNR 4b t3
				bac.012	CHNR 4c t3	10	1	500	10	510	Med	49.5	20422	42.0817	CHNR 4c t3
				bac.013	CHNR 5a t3	10	1	500	10	510	Med	49.5	5516	11.3663	CHNR 5a t3
				bac.014	CHNR 5b t3	10	1	500	10	510	Med	49.5	4242	8.74109	CHNR 5b t3
				bac.015	CHNR 5c t3	10	1	500	10	510	Med	49.5	4407	9.08109	CHNR 5c t3
				bac.016	CHNR 6a t3	100	1	500	10	510	Med	49.5	6747	139.029	CHNR 6a t3
				bac.017	CHNR 6b t3	100	1	500	10	510	Med	49.5	6701	138.081	CHNR 6b t3
				bac.018	CHNR 6c t3	100	1	500	10	510	Med	49.5	6968	143.583	CHNR 6c t3
				bac.043	CHNR 1a t5	100	1	500	10	510	Med	49.5	6745	138.988	CHNR 1a t5
				bac.044	CHNR 1b t5	100	1	500	10	510	Med	49.5	6612	136.247	CHNR 1b t5
				bac.045	CHNR 1c t5	100	1	500	10	510	Med	49.5	6702	138.102	CHNR 1c t5
				bac.046	CHNR 2a t5	10	1	500	10	510	Med	49.5	30565	62.9824	CHNR 2a t5
				bac.047	CHNR 2b t5	10	1	500	10	510	Med	49.5	31248	64.3898	CHNR 2b t5
				bac.048	CHNR 2c t5	10	1	500	10	510	Med	49.5	31230	64.3527	CHNR 2c t5
				bac.049	CHNR 3a t5	100	1	500	10	510	Med	49.5	5088	104.844	CHNR 3a t5
				bac.050	CHNR 3b t5	100	1	500	10	510	Med	49.5	5085	104.782	CHNR 3b t5
				bac.051	CHNR 3c t5	100	1	500	10	510	Med	49.5	4825	99.4242	CHNR 3c t5
				bac.052	CHNR 4a t5	10	1	500	10	510	Med	49.5	21717	44.7502	CHNR 4a t5
				bac.053	CHNR 4b t5	10	1	500	10	510	Med	49.5	17375	35.803	CHNR 4b t5
				bac.054	CHNR 4c t5	10	1	500	10	510	Med	49.5	22374	46.104	CHNR 4c t5
				bac.055	CHNR 5a t5	10	1	500	10	510	Med	49.5	6312	13.0065	CHNR 5a t5
				bac.056	CHNR 5b t5	10	1	500	10	510	Med	49.5	5049	10.404	CHNR 5b t5
				bac.057	CHNR 5c t5	10	1	500	10	510	Med	49.5	5182	10.6781	CHNR 5c t5
				bac.058	CHNR 6a t5	10	1	500	10	510	Med	49.5	62661	129.12	CHNR 6a t5
				bac.059	CHNR 6b t5	10	1	500	10	510	Med	49.5	63748	131.36	CHNR 6b t5
				bac.060	CHNR 6c t5	10	1	500	10	510	Med	49.5	65175	134.3	CHNR 6c t5
				bac.073	CHNR 1a t0	10	1	500	10	510	Med	49.5	10014	20.6349	CHNR 1a t0
				bac.074	CHNR 1b t0	10	1	500	10	510	Med	49.5	9938	20.4783	CHNR 1b t0
				bac.075	CHNR 1c t0	10	1	500	10	510	Med	49.5	9890	20.3794	CHNR 1c t0
				bac.076	CHNR 2a t0	10	1	500	10	510	Med	49.5	9999	20.604	CHNR 2a t0
				bac.077	CHNR 2b t0	10	1	500	10	510	Med	49.5	10026	20.6596	CHNR 2b t0
				bac.078	CHNR 2c t0	10	1	500	10	510	Med	49.5	10019	20.6452	CHNR 2c t0
				bac.079	CHNR 3a t0	10	1	500	10	510	Med	49.5	8028	16.5425	CHNR 3a t0
				bac.080	CHNR 3b t0	10	1	500	10	510	Med	49.5	7932	16.3447	CHNR 3b t0
				bac.081	CHNR 3c t0	10	1	500	10	510	Med	49.5	8337	17.1793	CHNR 3c t0
				bac.082	CHNR 4a t0	10	1	500	10	510	Med	49.5	8133	16.7589	CHNR 4a t0
				bac.083	CHNR 4b t0	10	1	500	10	510	Med	49.5	8153	16.8001	CHNR 4b t0
				bac.084	CHNR 4c t0	10	1	500	10	510	Med	49.5	8233	16.965	CHNR 4c t0
				bac.085	CHNR 5a t0	10	1	500	10	510	Med	49.5	1925	3.96667	CHNR 5a t0
				bac.086	CHNR 5b t0	10	1	500	10	510	Med	49.5	2060	4.24485	CHNR 5b t0
				bac.087	CHNR 5c t0	10	1	500	10	510	Med	49.5	2100	4.32727	CHNR 5c t0
				bac.088	CHNR 6a t0	10	1	500	10	510	Med	49.5	2077	4.27988	CHNR 6a t0
				bac.089	CHNR 6b t0	10	1	500	10	510	Med	49.5	2040	4.20364	CHNR 6b t0
				bac.090	CHNR 6c t0	10	1	500	10	510	Med	49.5	2069	4.26339	CHNR 6c t0
				pp.019	CHNR 1a t3	10	1	500	0	500	Med	49.5	4750	9.59596	CHNR 1a t3
				pp.020	CHNR 1b t3	10	1	500	0	500	Med	49.5	1930	3.89899	CHNR 1b t3
				pp.021	CHNR 1c t3	10	1	500	0	500	Med	49.5	1323	2.67273	CHNR 1c t3
				pp.022	CHNR 2a t3	10	1	500	0	500	Med	49.5	668	1.34949	CHNR 2a t3
				pp.023	CHNR 2b t3	10	1	500	0	500	Med	49.5	459	0.927273	CHNR 2b t3
				pp.024	CHNR 2c t3	10	1	500	0	500	Med	49.5	357	0.721212	CHNR 2c t3
				pp.025	CHNR 3a t3	10	1	500	0	500	Med	49.5	390	0.787879	CHNR 3a t3
				pp.026	CHNR 3b t3	10	1	500	0	500	Med	49.5	487	0.983838	CHNR 3b t3
				pp.027	CHNR 3c t3	10	1	500	0	500	Med	49.5	416	0.840404	CHNR 3c t3
				pp.028	CHNR 4a t3	10	1	500	0	500	Med	49.5	129	0.260606	CHNR 4a t3
				pp.029	CHNR 4b t3	10	1	500	0	500	Med	49.5	98	0.19798	CHNR 4b t3
				pp.030	CHNR 4c t3	10	1	500	0	500	Med	49.5	94	0.189899	CHNR 4c t3
				pp.031	CHNR 1a t5	10	1	500	0	500	Med	49.5	791	1.59798	CHNR 1a t5
				pp.032	CHNR 1b t5	10	1	500	0	500	Med	49.5	933	1.88485	CHNR 1b t5
				pp.033	CHNR 1c t5	10	1	500	0	500	Med	49.5	505	1.0202	CHNR 1c t5
				pp.034	CHNR 2a t5	10	1	500	0	500	Med	49.5	259	0.523232	CHNR 2a t5
				pp.035	CHNR 2b t5	10	1	500	0	500	Med	49.5	174	0.351515	CHNR 2b t5
				pp.036	CHNR 2c t5	10	1	500	0	500	Med	49.5	109	0.220202	CHNR 2c t5
				pp.037	CHNR 3a t5	10	1	500	0	500	Med	49.5	454	0.917172	CHNR 3a t5
				pp.038	CHNR 3b t5	10	1	500	0	500	Med	49.5	311	0.628283	CHNR 3b t5
				pp.039	CHNR 3c t5	10	1	500	0	500	Med	49.5	297	0.6	CHNR 3c t5
				pp.040	CHNR 4a t5	10	1	500	0	500	Med	49.5	102	0.206061	CHNR 4a t5
				pp.041	CHNR 4b t5	10	1	500	0	500	Med	49.5	120	0.242424	CHNR 4b t5
				pp.042	CHNR 4c t5	10	1	500	0	500	Med	49.5	107	0.216162	CHNR 4c t5
				pp.061	CHNR 1a t0	10	1	500	0	500	Med	49.5	1556	3.14343	CHNR 1a t0
				pp.062	CHNR 1b t0	10	1	500	0	500	Med	49.5	950	1.91919	CHNR 1b t0
				pp.063	CHNR 1c t0	10	1	500	0	500	Med	49.5	639	1.29091	CHNR 1c t0
				pp.064	CHNR 2a t0	10	1	500	0	500	Med	49.5	468	0.945455	CHNR 2a t0
				pp.065	CHNR 2b t0	10	1	500	0	500	Med	49.5	313	0.632323	CHNR 2b t0
				pp.066	CHNR 2c t0	10	1	500	0	500	Med	49.5	303	0.612121	CHNR 2c t0
				pp.067	CHNR 3a t0	10	1	500	0	500	Med	49.5	256	0.517172	CHNR 3a t0
				pp.068	CHNR 3b t0	10	1	500	0	500	Med	49.5	200	0.40404	CHNR 3b t0
				pp.069	CHNR 3c t0	10	1	500	0	500	Med	49.5	162	0.327273	CHNR 3c t0
				pp.070	CHNR 4a t0	10	1	500	0	500	Med	49.5	143	0.288889	CHNR 4a t0
				pp.071	CHNR 4b t0	10	1	500	0	500	Med	49.5	149	0.30101	CHNR 4b t0
				pp.072	CHNR 4c t0	10	1	500	0	500	Med	49.5	126	0.254545	CHNR 4c t0
				bac.001	CHNR 6a t5	100	1	500	10	510	Med	46.9	4647	101.065	CHNR 6a t5
				bac.002	CHNR 6b t5	100	1	500	10	510	Med	46.9	4461	97.0196	CHNR 6b t5
				bac.003	CHNR 6c t5	100	1	500	10	510	Med	46.9	4567	99.3249	CHNR 6c t5
				bac.004	CHNR 6a t5	10	1	500	10	510	Med	46.9	44608	97.0153	CHNR 6a t5
				bac.005	CHNR 6b t5	10	1	500	10	510	Med	46.9	42133	91.6325	CHNR 6b t5
				bac.006	CHNR 6c t5	10	1	500	10	510	Med	46.9	43065	93.6595	CHNR 6c t5
[truncated: 6 more columns]

## Sheet: NH4
		0	33	25.2	29.1					0	6.2	4.7	5.45
		0.1	54.5	58.2	56.35					0.5	28.9	29	28.95
		0.25	95.1	92.4	93.75					1	100	93.8	96.9
		0.5	155	154.9	154.95					5	420.7	413.5	417.1
		1	500	535.5	517.75		y-int	8.8754							y-int	1.8456
							slope	484.47							slope	83.233
		0	37.9	41	39.45					0	4.8	5.3	5.05
		0.1	61.7	66.9	64.3					0.5	22.8	23.5	23.15
		0.25	105.5	101.4	103.45					1	79.5	88.4	83.95
		0.5	173.3	179.2	176.25					5	323	335.2	329.1
							y-int	37.547		10	599.7	600	599.85		y-int	10.409
							slope	274.43							slope	59.943
		A	B	C				Average	StDev
T0	1	482.9	408.8	420	0.97844	0.825489	0.848607	0.884178	0.0824468																															T=0	a	b	c		Anova: Single Factor for t=0
	2	123.9	128.3	131.2	0.237424	0.246506	0.252492	0.245474	0.00758684																															Syn+Bac+lysate	0.97844	0.825489	0.848607
	3	490.1	489.2	520.3	0.993301	0.991443	1.05564	1.01346	0.0365379		T0	Tend	Increase																											Syn+Bac	0.237424	0.246506	0.252492		SUMMARY
	4	215.4	219.4	201	0.42629	0.434546	0.396567	0.419134	0.0199754	1a	0.97844	0.150977	-0.827463																											Syn+lysate	0.993301	0.991443	1.05564		Groups	Count	Sum	Average	Variance
	5	338.3	156.1	191.9	0.679969	0.303888	0.377783	0.45388	0.199254	1b	0.825489	0.176467	-0.649022																											Syn	0.42629	0.434546	0.396567		DC2+Bac+Lys	3	2.65254	0.884178	0.00679747
	6	421	407.9	459.4	0.850671	0.823631	0.929933	0.868078	0.0552474	1c	0.848607	0.107536	-0.741071																											Bac	0.679969	0.303888	0.377783		DC2+Bac	3	0.736421	0.245474	5.75601e-05
T1	1	166	153.9	164.5	2.59565	2.39379	2.57063	2.52002	0.110033	2a	0.237424	0.252578	0.0151542		Average																									Bac+lysate	0.850671	0.823631	0.929933		DC2+Lys	3	3.04038	1.01346	0.00133502
	2	45.1	33.5	30.2	0.0275225	-0.0147469	-0.0267719	-0.00466543	0.0285166	2b	0.246506	0.0838407	-0.162665										StDev																						DC2	3	1.2574	0.419134	0.000399015
	3	183.7	182.2	196.9	2.89093	2.86591	3.11114	2.95599	0.134943	2c	0.252492	0.0605048	-0.191987	Time (d)	0	1	2	3	4	5	Increase		0	1	2	3	4	5																	Bac	3	1.36164	0.45388	0.0397023
	4	59.4	29.5	30.5	0.0796305	-0.0293226	-0.0256787	0.00820974	0.061879	3a	0.993301	0.156362	-0.836939	Syn+Bac+lysate	0.884178	2.52002	0.316892	0.0836388	0.149062	0.144993	-0.739186		0.0476007	0.0635276	0.189322	0.00775564	0.0134736	0.0201223												T=5	a	b	c		Bac+Lys	3	2.60424	0.868078	0.00305228
	5	164.3	33	32.5	0.461877	-0.0165689	-0.0183908	0.142306	0.276759	3b	0.991443	0.113998	-0.877445	Syn+Bac	0.245474	-0.00466543	0.0468373	0.117649	0.0995177	0.132308	-0.113166		0.00438026	0.0164641	0.0107759	0.0377249	0.0108921	0.0605111												Syn+Bac+lysate	0.150977	0.176467	0.107536
	6	106.8	97.1	115.6	1.60804	1.44622	1.75485	1.60304	0.154374	3c	1.05564	0.104664	-0.950974	Syn+lysate	1.01346	2.95599	0.411548	1.9011	0.143557	0.125008	-0.888453		0.0210952	0.0779093	0.139452	0.203167	0.00877528	0.0159069												Syn+Bac	0.252578	0.0838407	0.0605048
T2	1	110.6	340.7	35.9	0.209971	0.684923	0.0557818	0.316892	0.327916	4a	0.42629	0.14954	-0.276749	Syn	0.419134	0.00820974	0.0501399	0.106474	0.213565	0.109211	-0.309923		0.0115328	0.0357259	0.00935503	0.0308769	0.0421428	0.0201713												Syn+lysate	0.156362	0.113998	0.104664		ANOVA
	2	42	26	26.7	0.0683729	0.0353471	0.036792	0.0468373	0.0186643	4b	0.434546	0.0881489	-0.346397	Bac	0.45388	0.142306	0.539678	0.129188	0.120221	0.169286	-0.284594		0.11504	0.159787	0.0107005	0.0173651	0.0160842	0.0259395												Syn	0.14954	0.0881489	0.089944		Source of Variation	SS	df	MS	F
	3	59.3	25.2	23.8	0.690284	0.280591	0.26377	0.411548	0.241539	4c	0.396567	0.089944	-0.306623	Bac+lysate	0.868078	1.60304	6.5213	7.25063	7.48064	8.23883	7.37076		0.0318971	0.0891279	0.0482195	0.10773	0.0456401	0.0218915	0.0386867											Bac	0.219548	0.155285	0.133026		Between Groups	1.46959	5	0.293918	34.3472
	4	42.2	28	29.3	0.0687857	0.0394753	0.0421586	0.0501399	0.0162034	5a	0.679969	0.219548	-0.460421																											Bac+lysate	8.21948	8.2145	8.28252		Within Groups	0.102687	12	0.00855727
	5	265	265.3	280.7	0.52867	0.529289	0.561076	0.539678	0.0185338	5b	0.303888	0.155285	-0.148603
	6	541.5	539.8	552.6	6.48366	6.46323	6.61702	6.5213	0.0835185	5c	0.377783	0.133026	-0.244757																																Total	1.57228	17
T3	1	64.7	57.8	59	0.0989433	0.0738002	0.0781729	0.0836388	0.0134332	6a	0.850671	8.21948	7.36881
	2	90.5	60.6	58.4	0.192956	0.0840032	0.0759866	0.117649	0.0653414	6b	0.823631	8.2145	7.39087																																Anova: Single Factor for t=5
	3	146.2	104.1	122.8	2.26534	1.563	1.87496	1.9011	0.351896	6c	0.929933	8.28252	7.35259
	4	82.7	63.8	53.8	0.164534	0.0956637	0.0592246	0.106474	0.0534804																																				SUMMARY
	5	81.1	64.6	73.3	0.158703	0.0985789	0.130281	0.129188	0.0300772																																				Groups	Count	Sum	Average	Variance
	6	435.4	442.4	457.3	7.08992	7.2067	7.45527	7.25063	0.186593																																				DC2+Bac+Lys	3	0.434979	0.144993	0.00121472
T4	1	83.2	76.6	70.2	0.172517	0.148822	0.125845	0.149062	0.0233369																																				DC2+Bac	3	0.396923	0.132308	0.0109848
	2	68.8	61	58.8	0.120819	0.0928161	0.0849178	0.0995177	0.0188657																																				DC2+Lys	3	0.375023	0.125008	0.000759086
	3	80	73.1	72.3	0.161029	0.136257	0.133385	0.143557	0.0151992																																				DC2	3	0.327633	0.109211	0.00122065
	4	91.1	76.3	116.5	0.20088	0.147745	0.292069	0.213565	0.0729934																																				Bac	3	0.507859	0.169286	0.00201857
	5	72.5	59.7	73.7	0.134103	0.0881489	0.138411	0.120221	0.0278586																																				Bac+Lys	3	24.7165	8.23883	0.00143772
	6	454.5	456	463.4	7.42313	7.44801	7.57079	7.48064	0.079051
T5	1	77.2	84.3	65.1	0.150977	0.176467	0.107536	0.144993	0.0348528
	2	105.5	58.5	52	0.252578	0.0838407	0.0605048	0.132308	0.104808																																				ANOVA
	3	78.7	66.9	64.3	0.156362	0.113998	0.104664	0.125008	0.0275515																																				Source of Variation	SS	df	MS	F
	4	76.8	59.7	60.2	0.14954	0.0881489	0.089944	0.109211	0.0349378																																				Between Groups	164.139	5	32.8279	11168.8
	5	96.3	78.4	72.2	0.219548	0.155285	0.133026	0.169286	0.0449285																																				Within Groups	0.0352711	12	0.00293926
	6	502.5	502.2	506.3	8.21948	8.2145	8.28252	8.23883	0.0379172
																																													Total	164.175	17
																																													Not sure if ANOVAs are the answer for these… maybe just t tests between experimental and each control of interest? I don't really care about the differences between treatments.
		0	26.1	34	30.05					0	3.7	4.2	3.95
		0.1	64.4	70.7	67.55					0.5	21.5	22.9	22.2
		0.25	106.8	108.6	107.7					1	76.6	78.1	77.35
		0.5	165.4	178.7	172.05					5	321.3	329.1	325.2
		1	600.1	607.6	603.85		y-int	35.147		10	600.2	602.2	601.2		y-int	7.0709
							slope	278.54							slope	60.275
[truncated: 2 more columns]

## Sheet: QuotaCalcs
																			Same DC2 calculations, but with error					PWH3a Counts with Error
	DC2 Counts (x10^5/ml)
		0	1	2	3	4	5	Increase	(cell/ml)											Increase					395698400000	9625000000	cell/L
	DC2+Bac+Lys	7.62891	8.63214	15.8062	27.8379	47.0566	53.2335	45.6046	Increase in DC2 when Bac remineralises Lys										1a	43.3646					111980900000		cell/L
	DC2+Bac	7.92311	8.28775	11.9261	21.4029	31.5391	29.3069	21.3838	Increase in DC2 due to Bac alone										1b	42.435
	DC2+Lys	7.66068	6.98481	7.77831	10.2159	16.0691	20.1407	12.48	Increase in DC2 due to Lys alone										1c	51.0142				Decrease	283717500000	9625000000	cell/L
	DC2	7.64917	7.29742	6.56952	6.34024	6.17726	6.92943	-0.719738	No increase when DC2 is grown alone										2a	17.9781
								11.7409	Increase due to Bac remineralisation (DC2+Bac+Lys minus DC2+Bac minus DC2+Lys)										2b	20.6952				Cell quota	2.54		fmol/cell
																			2c	25.478
	DC2+Bac+Lys	0.228933	0.574991	2.61685	6.07825	9.45365	4.48815			1.17409e+09	cell/L								3a	11.1895					720.642	24.4475	uM N released by PWH3a cell lysis
	DC2+Bac	0.260718	0.713884	0.768637	4.64961	2.34554	3.66709			35.7084	uM N incorporated by DC2 from all sources (Lys, Bac remin, UF)								3b	14.3042
	DC2+Lys	0.0870969	0.161762	0.0244167	1.44464	2.0523	1.55472			9.19309	uM N incorporated by DC2 from Bac remin								3c	11.9463					36.0321	1.22238	uM N of PWH3a cell lysate, when 10ml added to 200ml culture
	DC2	0.195123	0.307789	0.54227	0.897248	0.492237	0.747911			9.77183	uM N incorporated by DC2 directly from Lys
										16.7435										Average	StDev
																			DC2+Bac+Lys	45.6046	4.70787	Increase in DC2 when Bac remineralises Lys
	PWH3a Counts																		DC2+Bac	21.3838	3.79709	Increase in DC2 due to Bac alone
																			DC2+Lys	12.48	1.62449	Increase in DC2 due to Lys alone
							Calculating N quota using NH4 decrease and cell increase
		T=0 A	390885900000	cell/L				NH4 at PWH3a T=0												11.7409	6.26266	Increase due to Bac remineralisation (DC2+Bac+Lys minus DC2+Bac minus DC2+Lys)
		T=0 B	400510900000	cell/L				1.34	uM				9.77183	uM N incorporated by DC2 directly from Lys						1.17409e+09	6.26266e+08	cell/L
		T=0	395698400000	cell/L	9625000000								9.19309	uM N incorporated by DC2 from Bac remin						9.19309	4.90366	uM N incorporated by DC2 from Bac remin
		T=end	111980900000	cell/L				Initial NH4 concentration					36.0321	uM N released by PWH3a cell lysis
								1000	uM				27.1198	percent of N directly from Lys
		Decrease	283717500000	cell/L	9625000000								25.5136	percent of N transferred via Bac						9.19309	4.90366	uM N incorporated by DC2 from Bac remin
								998.66	uM taken up by PWH3a				52.6334	percent from Lys total						36.0321	1.22238	uM N released by PWH3a cell lysis
	Cell quota	2.54	fmol/cell					0.00099866	mol / l											25.5136	53.4485	percent of N transferred via Bac
								2.52379e-15	mol / cell				26.5153	uM N from remineralisation
			720642450000	fmol/L	24447500000			2.52379	fmol / cell				74.2551	percent from remineralisation
			720.642	uM N released by PWH3a cell lysis				Exactly the same as CHN analysis					73.588	percent of lysate used
					24.4475															0.346357	0.134516	percent of N from PWH3a used by DC2 alone
			36.0321	uM N of PWH3a cell lysate, when 10ml added to 200ml culture
					1.22238															So DC2 is able to use more N than PWH3a provided… check out numbers on NMasBalance, though (are using just these DC2 numbers valid?)
			7.20642

## Sheet: QuotaData
Emma Shelford - GFF
August 10/2012
									B5:124			B5:124
	ug N	ug C		N	C				25000000	DC2 cells/ml		Don't know where the cell counts are for this…
B1	3.26034	15.5399	Ave Blank	5.25809	15.4451				30	ml DC2 filtered		15	ml PWH3a filtered
B2	7.25584	15.3504							750000000	DC2 cells/filter
D1	87.5919	406.066										However, am more confident on previous PWH3a quotas than for DC2
D2	87.3789	400.799
P1	119.103	683.774
P2	115.827	691.846										3.95698e+08	cells/ml	at T=0
												5.93548e+09	approx PWH3a cells/filter
			Corrected for Blank
				ug N	ug C	umol N	umol C	fmolN/cell	fmolC/cell
			DC2 1	82.3339	390.621	5.88099	32.5518	7.84132	43.4023
			DC2 2	82.1208	385.353	5.86577	32.1128	7.82103	42.817
			PWH3a 1	113.845	668.329	8.13179	55.6941	1.37003	9.38325
			PWH3a 2	110.569	676.401	7.89776	56.3667	1.3306	9.49658
							DC2	7.83117
							Range	0.0202946
							PWH3a	1.35032
							Range	0.0394277
			So, PWH3a quota is 0.54fmol (old data), and DC2 quota is 7.83 +/- 0.02 fmol (new data)

## Sheet: NMassBalance
					7.83	fmol N / DC2
					0.414	fmol N / Bac		(1998 Fukuda)
					720.642	uM input by PWH3a
		Increase	Increase	Increase	Increase	Increase	Total increase
		DC2	Bac	NH4	DC2 uM	Bac uM	uM
	DC2+Bac+Lys	4.56046e+09	1.17898e+09	-0.739186	35.7084	0.488099	35.4573	10.7484
	DC2+Bac	2.13838e+09	4.3637e+08	-0.113166	16.7435	0.180657	16.811	26.0505
	DC2+Lys	1.248e+09	8.60287e+08	-0.888453	9.77183	0.356159	9.23954
	DC2	-7.19738e+07	2.54377e+08	-0.309923	-0.563555	0.105312	-0.768166
	Bac		7.18327e+07	-0.284594		0.0297387	-0.254855
	Bac+Lys		1.27344e+09	7.37076		0.527204	7.89796
						DC2-N (DC2+Bac+Lys)	DC2-N (NO3 in DC2+Bac)	DC2-N (DC2+Lys)	Ammonium (Bac+Lys)										Lys available	DC2-N (DC2+Bac+Lys)	DC2-N (NO3 in DC2+Bac)	DC2-N (DC2+Lys)	Ammonium (Bac+Lys)
						35.4573														35.4573
							16.811	9.23954	7.89796												16.811	9.23954	7.89796
																			34.506
									33.9485									StDev	2.461	3.69	2.9	1.33	0.1
																					33.9485
																					3.19201
														N increase	StDev
	Same thing, but now with error bars												DC2+Bac+Lys	39.8502	2.12903
													DC2+Bac,DC2+Lys,Bac+Lys	43.5247	1.8441
		Increase	Increase	Increase	Increase	Increase	Total increase
		DC2	Bac	NH4	DC2 uM	Bac uM	uM				Average	StDev			Average	StDev			Average	StDev
	1a	4.33646e+09	1.19898e+10	-0.827463	33.9545	4.96379	38.0908			DC2+Bac+Lys	39.8502	2.12903		DC2+Bac+Lys	39.8502	2.12903		DC2+Bac+Lys	39.8502	2.12903
	1b	4.2435e+09	1.15803e+10	-0.649022	33.2266	4.79426	37.3718			DC2+Bac	18.4369	1.67564		DC2+Bac	18.4369	1.67564		All Others	43.5247	1.8441
	1c	5.10142e+09	1.17993e+10	-0.741071	39.9441	4.88492	44.088			DC2+Lys	12.445	0.767843		DC2+Lys	12.445	0.767843
	2a	1.79781e+09	4.28006e+09	0.0151542	14.0768	1.77195	15.8639			DC2	0.179642	0.427127		Bac+Lys	12.6428	0.0577563		So there is definitely overlap, and therefore no significant difference
	2b	2.06952e+09	4.4011e+09	-0.162665	16.2044	1.82205	17.8637			Bac	0.0127937	0.0556508
	2c	2.5478e+09	4.40994e+09	-0.191987	19.9493	1.82572	21.583			Bac+Lys	12.6428	0.0577563
	3a	1.11895e+09	8.79011e+09	-0.836939	8.76136	3.63911	11.5635
	3b	1.43042e+09	8.82128e+09	-0.877445	11.2002	3.65201	13.9747
	3c	1.19463e+09	8.19722e+09	-0.950974	9.35395	3.39365	11.7966
	4a	-3.14421e+07	2.80741e+09	-0.276749	-0.246191	1.16227	0.639327												Total initial N in each treatment
	4b	-1.42594e+08	1.90615e+09	-0.346397	-1.11651	0.789146	-0.673764												NH4	DC2	Bac	NO3	PWH3a	Total (uM N)
	4c	-4.18851e+07	2.91774e+09	-0.306623	-0.32796	1.20794	0.573362											DC2+Bac+Lys	0.884178	5.97344	0.0760919	?	7.66	14.5937	+ NO3
	5a		9.03988e+08	-0.460421		0.374251	-0.0861697											DC2+Bac	0.245474	6.2038	0.0824122	?	7.66	14.1917	+ NO3
	5b		6.15915e+08	-0.148603		0.254989	0.106386											DC2+Lys	1.01346	5.99831	0.0673689	0	7.66	14.7391
	5c		6.35079e+08	-0.244757		0.262923	0.0181653											Bac+Lys	0.868078	0	0.0175907	?	7.66	8.54567	+ NO3
	6a		1.2484e+10	7.36881		5.16837	12.5372
	6b		1.27156e+10	7.39087		5.26425	12.6551
	6c		1.30037e+10	7.35259		5.38352	12.7361
				Increase	Increase	Increase	Increase	Increase
				NH4	DC2 uM	Bac uM	DC2-NH4	Bac-NH4
	DC2+Bac+Lys			-0.739186	35.7084	4.88099	35.0581	4.7921
	DC2+Bac			-0.113166	16.7435	1.80657	16.6413	1.79555
	DC2+Lys			-0.888453	9.77183	3.56159	9.1207	3.32427
	Bac+Lys			7.37076		5.27204		12.6428
			StDev		3.68626						DC2+Bac+Lys	35.7084								DC2+Bac+Lys	DC2+Bac	DC2+Lys	Bac+Lys
			StDev		2.97312						DC2(+Bac)+Lys								Ammonium
			StDev		1.27198						DC2+Lys	9.77183							DC2
			Ammonium	DC2	Bac	StDev					Lys available		34.506						Bac
		DC2+Bac+Lys		35.0581	4.7921	2.12903					DC2+Bac		16.7435
		DC2+Bac		16.6413	1.79555	1.67564									StDev
		DC2+Lys		9.1207	3.32427	0.767843					DC2+Bac+Lys	35.7084			3.686
		Bac+Lys	7.37076		12.6428	0.0577563					DC2 from Lys		16.7435		2.973
											DC2 from UF		18.9649		4.7394
											Lys available			34.506	2.461

## Sheet: N-Figures
	DC2 N content (in mol)
	Time (d)	0	1	2	3	4	5			DC2+Bac+Lys
	Syn+Bac+lysate	5.97344	6.75896	12.3762	21.7971	36.8453	41.6818			Time(d)	0	1	2	3	4	5
	Syn+Bac	6.2038	6.48931	9.33814	16.7584	24.6951	22.9473			DC2-N	5.97344	6.75896	12.3762	21.7971	36.8453	41.6818		DC2+Bac+Lys DC2-N		35.7084	2.03158
	Syn+lysate	5.99831	5.4691	6.09042	7.99907	12.5821	15.7701			Bac-N	0.0760919	0.151262	0.327052	0.409466	0.472606	0.564191		DC2+Bac DC2-N		16.7435	1.66195
	Syn	5.9893	5.71388	5.14394	4.96441	4.83679	5.42575			NH4	0.884178	2.52002	0.316892	0.0836388	0.149062	0.144993		DC2+Lys DC2-N		9.77183	0.703939
																		Bac+Lys NH4		7.37076	0.00621072
	StDev										0.103493	0.259934	1.18299	2.74776	4.27367	2.02894
	Syn+Bac+lysate	0.103493	0.259934	1.18299	2.74776	4.27367	2.02894				0.00194441	0.0759688	0.0254297	0.0137485	0.0190733	0.00398228				33.8861	1.80489
	Syn+Bac	0.117862	0.322722	0.347474	2.10193	1.06034	1.65776				0.0476007	0.0635276	0.189322	0.00775564	0.0134736	0.0201223
	Syn+lysate	0.0393735	0.0731268	0.0110379	0.653071	0.927775	0.702837
	Syn	0.0882085	0.139141	0.245141	0.405615	0.222523	0.338105			DC2+Bac
										Time(d)	0	1	2	3	4	5
	Bac N content (in mol)									DC2-N	6.2038	6.48931	9.33814	16.7584	24.6951	22.9473
	Time (d)	0	1	2	3	4	5			Bac-N	0.0824122	0.0744925	0.152027	0.221884	0.261682	0.263069
	Syn+Bac+lysate	0.0760919	0.151262	0.327052	0.409466	0.472606	0.564191			NH4	0.245474	0	0.0468373	0.117649	0.0995177	0.132308
	Syn+Bac	0.0824122	0.0744925	0.152027	0.221884	0.261682	0.263069
	Syn+lysate	0.0673689	0.147519	0.287219	0.350485	0.398235	0.423528				0.117862	0.322722	0.347474	2.10193	1.06034	1.65776
	Syn	0.0685578	0.0779937	0.143324	0.159623	0.163515	0.17387				0.000512933	0.0372469	0.00986963	0.021096	0.0109541	0.00224701
	Bac	0.0173035	0.0138892	0.0330716	0.0402801	0.0431645	0.0470423				0.00438026	0.0164641	0.0107759	0.0377249	0.0108921	0.0605111
	Bac+Lys	0.0175907	0.0428607	0.505181	0.580557	0.559706	0.544795
										DC2+Lys
	StDev									Time(d)	0	1	2	3	4	5
	Syn+Bac+lysate	0.00194441	0.0759688	0.0254297	0.0137485	0.0190733	0.00398228			DC2-N	5.99831	5.4691	6.09042	7.99907	12.5821	15.7701
	Syn+Bac	0.000512933	0.0372469	0.00986963	0.021096	0.0109541	0.00224701			Bac-N	0.0673689	0.147519	0.287219	0.350485	0.398235	0.423528
	Syn+lysate	0.00120344	0.0737766	0.00579951	0.00714221	0.0133572	0.00720286			NH4	1.01346	2.95599	0.411548	1.9011	0.143557	0.125008
	Syn	0.000313618	0.0389989	0.00648318	0.011888	0.0127236	0.0134208
	Bac	0.000451637	0.00694533	0.00131387	0.00341247	0.00376725	0.00341814				0.0393735	0.0731268	0.0110379	0.653071	0.927775	0.702837
	Bac+Lys	9.58858e-05	0.0214332	0.00246941	0.00703034	0.00984436	0.00620998				0.00120344	0.0737766	0.00579951	0.00714221	0.0133572	0.00720286
											0.0210952	0.0779093	0.139452	0.203167	0.00877528	0.0159069
	NH4 content (in mol)
	Time (d)	0	1	2	3	4	5			DC2
	Syn+Bac+lysate	0.884178	2.52002	0.316892	0.0836388	0.149062	0.144993			Time(d)	0	1	2	3	4	5
	Syn+Bac	0.245474	-0.00466543	0.0468373	0.117649	0.0995177	0.132308			DC2-N	5.9893	5.71388	5.14394	4.96441	4.83679	5.42575
	Syn+lysate	1.01346	2.95599	0.411548	1.9011	0.143557	0.125008			Bac-N	0.0685578	0.0779937	0.143324	0.159623	0.163515	0.17387
	Syn	0.419134	0.00820974	0.0501399	0.106474	0.213565	0.109211			NH4	0.419134	0.00820974	0.0501399	0.106474	0.213565	0.109211
	Bac	0.45388	0.142306	0.539678	0.129188	0.120221	0.169286
	Bac+Lys	0.868078	1.60304	6.5213	7.25063	7.48064	8.23883				0.0882085	0.139141	0.245141	0.405615	0.222523	0.338105
											0.000313618	0.0389989	0.00648318	0.011888	0.0127236	0.0134208
	StDev										0.0115328	0.0357259	0.00935503	0.0308769	0.0421428	0.0201713
	Syn+Bac+lysate	0.0476007	0.0635276	0.189322	0.00775564	0.0134736	0.0201223
	Syn+Bac	0.00438026	0.0164641	0.0107759	0.0377249	0.0108921	0.0605111			Bac
	Syn+lysate	0.0210952	0.0779093	0.139452	0.203167	0.00877528	0.0159069			Time(d)	0	1	2	3	4	5
	Syn	0.0115328	0.0357259	0.00935503	0.0308769	0.0421428	0.0201713
	Bac	0.11504	0.159787	0.0107005	0.0173651	0.0160842	0.0259395			Bac-N	0.0173035	0.0138892	0.0330716	0.0402801	0.0431645	0.0470423
	Bac+Lys	0.0318971	0.0891279	0.0482195	0.10773	0.0456401	0.0218915			NH4	0.45388	0.142306	0.539678	0.129188	0.120221	0.169286
											0.000451637	0.00694533	0.00131387	0.00341247	0.00376725	0.00341814
											0.11504	0.159787	0.0107005	0.0173651	0.0160842	0.0259395
										Bac+Lys
										Time(d)	0	1	2	3	4	5
										Bac-N	0.0175907	0.0428607	0.505181	0.580557	0.559706	0.544795
										NH4	0.868078	1.60304	6.5213	7.25063	7.48064	8.23883
											9.58858e-05	0.0214332	0.00246941	0.00703034	0.00984436	0.00620998
											0.0318971	0.0891279	0.0482195	0.10773	0.0456401	0.0218915
