# Supplementary material for: Virus-mediated transfer of nitrogen from heterotrophic bacteria to phytoplankton
Source: Copernicus journal article supplement (doi:10.5194/bg-15-809-2018), 2018-02-09
Supplement: Supplementary file 2 [file Shelford and Suttle 2018-SB and JP Field Exp.xlsx]

## Sheet: Info
Information on Stations
SB
Location	Centennial Beach, Tsawwassen, Semiahoo Bay
Date	2013-08-26
Time	7:30pm
Weather	Overcast, very dry conditions in the weeks/months prior except for a very light sprinkling that day
Temperature	20.2	C
Salinity	29	psu
Chla	0.945478
NO3+NO2
PO4
SiO3
Ammonium	0.0839776	uM
Bacteria	1.19111e+07
Virus	6.3087e+07
PP	16582.4
PP Species	unknown strange little guys that I have to ID
JP
Location	Jericho Pier, Vancouver, English Bay
Date	2013-08-27
Time	10:00am
Weather	Overcast, very dry conditions in the weeks/months prior except for a very light sprinkling overnight
Temperature	19.5	C
Salinity	21	psu
Chla	4.26246
NO3+NO2
PO4
SiO3
Ammonium	0.112918	uM
Bacteria	1.44159e+06
Virus	2.76097e+07
PP	18767.7
PP Species	predominately a mixed diatom assemblage
Times
t0	2013-08-27	1:30pm	0
t1	2013-08-27	8:00pm	6.5
t2	2013-08-28	9:00am	19.5
t3	2013-08-28	3:00pm	25.5

## Sheet: NH4
Ammonium Data
			A	B	Average
		0	29.5	30	29.75
		0.1	73.9	77.2	75.55										slope	494.12
		0.25	142.5	146.7	144.6										intercept	21.705
		0.5	245.6	245.7	245.65
		1	499.9	554.3	527.1
		5
		10
SB
Treatment	Time	A	B	C	A	B	C	Average	StDev
SW+L	t0	48.5	47.9	46.5	0.0542277	0.0530134	0.0501801	0.0524738	0.00207707
SW+N	t0	519.4	354.1	377.1	1.00724	0.672701	0.719248	0.799728	0.181207		SB Ave	0	6.5	19.5	25.5
SW	t0	72.4	62.9	54.3	0.102597	0.0833704	0.0659658	0.0839776	0.0183229		SW+L	0.0524738	0.0483587	0.0540253	0.0515293
SW+L	t1	57.8	41	38	0.0730491	0.0390492	0.0329778	0.0483587	0.0215969		SW+N	0.799728	0.408123	0.104485	0.0811443
SW+N	t1	208.5	194.6	267	0.378036	0.349905	0.496428	0.408123	0.0777572		SW	0.0839776	0.0611761	0.0634697	0.0532833
SW	t1	67	45.6	43.2	0.091668	0.0483587	0.0435016	0.0611761	0.0265182
SW+L	t2	56.4	47.4	41.4	0.0702157	0.0520015	0.0398587	0.0540253	0.0152794		SB StDev	0	6.5	19.5	25.5
SW+N	t2	62.8	43.7	113.5	0.0831681	0.0445135	0.185775	0.104485	0.0730035		SW+L	0.0011992	0.012469	0.00882154	0.00192822
SW	t2	68.7	46.7	43.8	0.0951085	0.0505849	0.0447159	0.0634697	0.0275566		SW+N	0.10462	0.0448931	0.0421486	0.0238245
SW+L	t3	48.8	47.2	45.5	0.0548349	0.0515968	0.0481563	0.0515293	0.00333978		SW	0.0105788	0.0153103	0.0159098	0.0052675
SW+N	t3	48.8	51.3	85.3	0.0548349	0.0598944	0.128704	0.0811443	0.0412652
SW	t3	52.9	47.2	44	0.0631324	0.0515968	0.0451206	0.0532833	0.00912357
JP
Treatment	Time	A	B	C	A	B	C	Average	StDev
SW+L	t0	128.2	115.7	112.9	0.215525	0.190227	0.18456	0.196771	0.0164866
SW+N	t0	420.9	421.3	443.8	0.807891	0.8087	0.854236	0.823609	0.0265267		JP Ave	0	6.5	19.5	25.5
SW	t0	81.2	75.8	75.5	0.120406	0.109477	0.10887	0.112918	0.00649195		SW+L	0.196771	0.088295	0.0592872	0.0553745
SW+L	t1	103.6	45.7	46.7	0.165739	0.0485611	0.0505849	0.088295	0.0670762		SW+N	0.823609	0.391258	0.0961878	0.0462674
SW+N	t1	192.6	143.6	308.9	0.345857	0.246691	0.581225	0.391258	0.171826		SW	0.112918	0.0551722	0.0456603	0.0433667
SW	t1	60.2	43.9	42.8	0.0779062	0.0449182	0.0426921	0.0551722	0.0197197
SW+L	t2	68.2	43.8	41	0.0940966	0.0447159	0.0390492	0.0592872	0.0302786		SB StDev	0	6.5	19.5	25.5
SW+N	t2	59.3	41	107.4	0.0760848	0.0390492	0.17343	0.0961878	0.0694091		SW+L	0.00951856	0.0387264	0.0174814	0.00603343
SW	t2	50.6	43.4	38.8	0.0584777	0.0439063	0.0345969	0.0456603	0.0120366		SW+N	0.0153152	0.0992038	0.0400733	0.0025847
SW+L	t3	50	53.7	43.5	0.0572634	0.0647515	0.0441087	0.0553745	0.0104502		SW	0.00374813	0.0113852	0.00694936	0.00270598
SW+N	t3	46.9	44.3	42.5	0.0509896	0.0457278	0.0420849	0.0462674	0.00447682
SW	t3	45.7	41.2	42.5	0.0485611	0.039454	0.0420849	0.0433667	0.00468689
					SB	JP			JP
				For R:	0.0542277	0.215525			Drawdown	A	B	C	Ave	StDev		Notes: Uptake of ammonium in both experiments (good, so they can use ammonium from
					0.0530134	0.190227		JP	SW+Lys	0.158261	0.125476	0.140452	0.141396	0.0164132		regeneration). No ammonium production, likely because N is in high demand and turnover
					0.0501801	0.18456			SW	0.0718449	0.0700235	0.0667854	0.0695513	0.00256259		is high. Very low concentration of ammonium in lysate (not sure why it's different between
					0.102597	0.120406		SB	SW+Lys	-0.00060714	0.00141666	0.0020238	0.00094444	0.00137757		experiments).
					0.0833704	0.109477			SW	0.0394641	0.0317737	0.0208451	0.0306943	0.00935629
					0.0659658	0.10887
					0.0730491	0.165739				0.00169864
					0.0390492	0.0485611				0.00551159
					0.0329778	0.0505849
					0.091668	0.0779062
					0.0483587	0.0449182
					0.0435016	0.0426921
					0.0702157	0.0940966
					0.0520015	0.0447159
					0.0398587	0.0390492
					0.0951085	0.0584777
					0.0505849	0.0439063
					0.0447159	0.0345969
					0.0548349	0.0572634
					0.0515968	0.0647515
					0.0481563	0.0441087
					0.0631324	0.0485611
					0.0515968	0.039454
					0.0451206	0.0420849

## Sheet: Chla
Chlorophyll a Data													t tests between t0 and t3
														SB	JP
													SW+L	0.111081	0.638454
Experiment	Treatment	Replicate	Time	Vol filt	Vol acetone	Fo	Fa	Fo corrected	Fa corrected	Chla ug/l			SW+N	0.000587641	0.142292
SB	SW+L	A	t0	50	10	3.4	2.2	3.7	2.5	0.703248			SW	0.203083	0.541988											Increases
SB	SW+L	B	t0	50	10	4.02	2.6	4.32	2.9	0.832177		SB		t0	t3	Increase		JP		t0	t3	Increase		Average		Chla	PP
SB	SW+L	C	t0	50	10	4.26	2.75	4.56	3.05	0.88492		SW+L	A	0.703248	0.8732	0.169952		SW+L	A	4.94618	5.18645	0.240276		SB	SW+Lys	0.179719	0.207979
SB	SW+N	A	t0	50	10	3.3	2.05	3.6	2.35	0.73255			B	0.832177	1.11348	0.281299			B	6.36439	5.39157	-0.972826			SW+N	0.527436	0.377482
SB	SW+N	B	t0	50	10	4.26	2.75	4.56	3.05	0.88492			C	0.88492	0.972826	0.087906			C	6.00105	5.98933	-0.0117208			SW	-0.164091	0.138298
SB	SW+N	C	t0	50	10	4.04	2.58	4.34	2.88	0.855618		SW+N	A	0.73255	1.40064	0.668086		SW+N	A	6.31165	5.42087	-0.890781		JP	SW+Lys	-0.24809	0.0997784
SB	SW	A	t0	50	10	4.27	2.69	4.57	2.99	0.925943			B	0.88492	1.34203	0.457111			B	5.94245	3.65689	-2.28556			SW+N	-1.95151	-0.0226507
SB	SW	B	t0	50	10	4.4	2.84	4.7	3.14	0.914222			C	0.855618	1.31273	0.457111			C	4.76451	2.0863	-2.6782			SW	0.187533	-0.00722518
SB	SW	C	t0	50	10	4.8	3.1	5.1	3.4	0.996268		SW	A	0.925943	0.990408	0.0644644		SW	A	3.89717	4.30739	0.410228
JP	SW+L	A	t0	50	10	15.8	7.36	16.1	7.66	4.94618			B	0.914222	0.691527	-0.222695			B	4.7352	4.71762	-0.0175812		StDev
JP	SW+L	B	t0	50	10	20.5	9.64	20.8	9.94	6.36439			C	0.996268	0.662225	-0.334043			C	4.15502	4.32498	0.169952		SB	SW+Lys	0.0970659	0.0793687
JP	SW+L	C	t0	50	10	19.3	9.06	19.6	9.36	6.00105															SW+N	0.121806	0.815795
JP	SW+N	A	t0	50	10	19.7	8.93	20	9.23	6.31165		SB Ave	0	25.5	t test	Increase		JP Ave	0	25.5	t test	Increase			SW	0.205616	0.439922
JP	SW+N	B	t0	50	10	19	8.86	19.3	9.16	5.94245		SW+L	0.806782	0.986501	0.111081	0.179719		SW+L	5.77054	5.52245		-0.24809		JP	SW+Lys	0.640162	0.749507
JP	SW+N	C	t0	50	10	15.3	7.17	15.6	7.47	4.76451		SW+N	0.824363	1.3518	0.000587641	0.527436		SW+N	5.67287	3.72135		-1.95151			SW+N	0.939366	0.427701
JP	SW	A	t0	50	10	12.3	5.65	12.6	5.95	3.89717		SW	0.945478	0.781387	0.203083	-0.164091		SW	4.26246	4.45		0.187533			SW	0.214446	0.114146
JP	SW	B	t0	50	10	15	6.92	15.3	7.22	4.7352		SB StDev						JP StDev
JP	SW	C	t0	50	10	13.2	6.11	13.5	6.41	4.15502		SW+L	0.0539595	0.069698		0.0970659		SW+L	0.425318	0.240832		0.640162
SB	SW+L	A	t3	50	10	3.65	2.16	3.95	2.46	0.8732		SW+N	0.0466793	0.0258419		0.121806		SW+N	0.466519	0.963146		0.939366
SB	SW+L	B	t3	50	10	4.51	2.61	4.81	2.91	1.11348		SW	0.0256195	0.104852		0.205616		SW	0.247813	0.133909		0.214446
SB	SW+L	C	t3	50	10	4.02	2.36	4.32	2.66	0.972826
SB	SW+N	A	t3	50	10	6.02	3.63	6.32	3.93	1.40064
SB	SW+N	B	t3	50	10	5.62	3.33	5.92	3.63	1.34203
SB	SW+N	C	t3	50	10	5.28	3.04	5.58	3.34	1.31273
SB	SW	A	t3	50	10	4.3	2.61	4.6	2.91	0.990408
SB	SW	B	t3	50	10	3.11	1.93	3.41	2.23	0.691527
SB	SW	C	t3	50	10	2.95	1.82	3.25	2.12	0.662225
JP	SW+L	A	t3	50	10	16.3	7.45	16.6	7.75	5.18645
JP	SW+L	B	t3	50	10	17	7.8	17.3	8.1	5.39157
JP	SW+L	C	t3	50	10	18.4	8.18	18.7	8.48	5.98933
JP	SW+N	A	t3	50	10	17.3	8.05	17.6	8.35	5.42087
JP	SW+N	B	t3	50	10	11.7	5.46	12	5.76	3.65689
JP	SW+N	C	t3	50	10	6.72	3.16	7.02	3.46	2.0863
JP	SW	A	t3	50	10	14	6.65	14.3	6.95	4.30739
JP	SW	B	t3	50	10	15.4	7.35	15.7	7.65	4.71762
JP	SW	C	t3	50	10	14.3	6.92	14.6	7.22	4.32498
Filter blank						-0.2	-0.2
Acetone blank						-0.3	-0.3
(I forgot to blank the machine, so subtract the acteon blank from all values)												Notes: Increased phytoplankton signal in SW+L (p<0.15) and SW+N (p<0.001) over SW in Semiahoo Bay.
												No significant differences between Jericho Pier time points for any treatments.

## Sheet: Bac
	Sample ID	Dilution factor	Acquisition time (min)	Sample volume (µl)	SYBR Green (µl)	Total volume (µl)	Flow mode	Flow rate (µl min-1)	HNA (events)	HNA (105 ml-1)	Sample ID
							High
							Med	52.1
bac.012	CHNF SB 1a t1	100	1	500	10	510	Med	52.1	7191	138.023	CHNF SB 1a t1
bac.013	CHNF SB 1b t1	100	1	500	10	510	Med	52.1	7325	140.595	CHNF SB 1b t1			SB						JP
bac.014	CHNF SB 1c t1	100	1	500	10	510	Med	52.1	7512	144.184	CHNF SB 1c t1				0	6.5	19.5	25.5			0	6.5	19.5	25.5		64.3954	3.73131e-05	35.4587	0.0061483
bac.015	CHNF SB 2a t1	100	1	500	10	510	Med	52.1	9911	190.23	CHNF SB 2a t1			1a	122.265	138.023	180.038	186.66		4a	14.2668	17.5816	38.0653	49.7255		60.595		53.4376		SB	JP	SB	JP
bac.016	CHNF SB 2b t1	100	1	500	10	510	Med	52.1	11515	221.017	CHNF SB 2b t1			1b	122.111	140.595	178.58	182.706		4b	14.2956	23.7428	57.382	67.7332		60.7678		48.261	For R:	122.265	14.2668	1.22265e+07	1.42668e+06
bac.017	CHNF SB 2c t1	100	1	500	10	510	Med	52.1	8913	171.075	CHNF SB 2c t1			1c	124.242	144.184	181.843	185.01		4c	14.524	27.6392	54.9635	62.785		22.2265		20.7965		122.111	14.2956	1.22111e+07	1.42956e+06
bac.018	CHNF SB 3a t1	100	1	500	10	510	Med	52.1	7947	152.534	CHNF SB 3a t1			2a	134.165	190.23	151.785	156.392		5a	14.5259	17.6756	32.881	35.3225		22.1113		22.1344		124.242	14.524	1.24242e+07	1.4524e+06
bac.019	CHNF SB 3b t1	100	1	500	10	510	Med	52.1	12506	240.038	CHNF SB 3b t1			2b	123.973	221.017	149.232	146.084		5b	14.4837	22.286	30.5374	36.618		12.476		33.5585		118.464	13.8772	1.18464e+07	1.38772e+06
bac.020	CHNF SB 3c t1	100	1	500	10	510	Med	52.1	12224	234.626	CHNF SB 3c t1			2c	126.756	171.075	128.023	139.232		5c	14.261	14.4107	34.2303	47.8196		14.1075		17.3033		120.864	14.8157	1.20864e+07	1.48157e+06
bac.032	CHNF JP 1a t1	100	1	500	10	510	Med	52.1	916	17.5816	CHNF JP 1a t1			3a	118.464	152.534	140.71	132.572		6a	13.8772	19.9655	28.5278	31.1804		10.2687		17.4069		118.004	14.5547	1.18004e+07	1.45547e+06
bac.033	CHNF JP 1b t1	100	1	500	10	510	Med	52.1	1237	23.7428	CHNF JP 1b t1			3b	120.864	240.038	127.083	131.132		6b	14.8157	20.2169	29.1324	32.2226		17.4088		17.7025		138.023	17.5816	1.38023e+07	1.75816e+06
bac.034	CHNF JP 4c t1	100	1	500	10	510	Med	52.1	1440	27.6392	CHNF JP 4c t1			3c	118.004	234.626	127.735	135.413		6c	14.5547	19.0806	28.0499	32.2572						140.595	23.7428	1.40595e+07	2.37428e+06
bac.035	CHNF JP 5a t1	10	1	500	10	510	Med	52.1	9209	17.6756	CHNF JP 5a t1																			144.184	27.6392	1.44184e+07	2.76392e+06
bac.036	CHNF JP 5b t1	10	1	500	10	510	Med	52.1	11611	22.286	CHNF JP 5b t1				0	6.5	19.5	25.5			0	6.5	19.5	25.5						152.534	19.9655	1.52534e+07	1.99655e+06
bac.037	CHNF JP 5c t1	10	1	500	10	510	Med	52.1	7508	14.4107	CHNF JP 5c t1			SW+L	122.873	140.934	180.154	184.792		SW+L	14.3621	22.9878	50.1369	60.0813		1.29686e-06	0.00082508			240.038	20.2169	2.40038e+07	2.02169e+06
bac.038	CHNF JP 6a t1	10	1	500	10	510	Med	52.1	10402	19.9655	CHNF JP 6a t1			SW+N	128.298	194.107	143.013	147.236		SW+N	14.4235	18.1241	32.5496	39.92		0.00104549	2.64363e-06			234.626	19.0806	2.34626e+07	1.90806e+06
bac.039	CHNF JP 6b t1	10	1	500	10	510	Med	52.1	10533	20.2169	CHNF JP 6b t1			SW	119.111	209.066	131.843	133.039		SW	14.4159	19.7543	28.5701	31.8868		T25.5-T0		T25.5-T0		180.038	38.0653	1.80038e+07	3.80653e+06
bac.040	CHNF JP 6c t1	10	1	500	10	510	Med	52.1	9941	19.0806	CHNF JP 6c t1														1a	64.3954	4a	35.4587		178.58	57.382	1.7858e+07	5.7382e+06
bac.052	CHNF SB 1a t2	100	1	500	10	510	Med	52.1	9380	180.038	CHNF SB 1a t2				0.686014	1.78666	0.943693	1.14657			0.0813597	2.92781	6.07607	5.37128	1b	60.595	4b	53.4376		181.843	54.9635	1.81843e+07	5.49635e+06
bac.053	CHNF SB 1b t2	100	1	500	10	510	Med	52.1	9304	178.58	CHNF SB 1b t2				3.04149	14.5469	7.53134	4.98682			0.0821633	2.28442	1.07885	3.96744	1c	60.7678	4c	48.261		140.71	28.5278	1.4071e+07	2.85278e+06
bac.054	CHNF SB 1c t2	100	1	500	10	510	Med	52.1	9474	181.843	CHNF SB 1c t2				0.886549	28.3093	4.43778	1.25747			0.279696	0.344584	0.313213	0.353308	3a	14.1075	6a	17.3033		127.083	29.1324	1.27083e+07	2.91324e+06
bac.055	CHNF SB 2a t2	100	1	500	10	510	Med	52.1	7908	151.785	CHNF SB 2a t2														3b	10.2687	6b	17.4069		127.735	28.0499	1.27735e+07	2.80499e+06
bac.056	CHNF SB 2b t2	100	1	500	10	510	Med	52.1	7775	149.232	CHNF SB 2b t2														3c	17.4088	6c	17.7025		186.66	49.7255	1.8666e+07	4.97255e+06
bac.057	CHNF SB 2c t2	100	1	500	10	510	Med	52.1	6670	128.023	CHNF SB 2c t2														ttest	0.000155761	ttest	0.0339121		182.706	67.7332	1.82706e+07	6.77332e+06
bac.058	CHNF SB 3a t2	100	1	500	10	510	Med	52.1	7331	140.71	CHNF SB 3a t2																			185.01	62.785	1.8501e+07	6.2785e+06
bac.059	CHNF SB 3b t2	100	1	500	10	510	Med	52.1	6621	127.083	CHNF SB 3b t2																			132.572	31.1804	1.32572e+07	3.11804e+06
bac.060	CHNF SB 3c t2	100	1	500	10	510	Med	52.1	6655	127.735	CHNF SB 3c t2																			131.132	32.2226	1.31132e+07	3.22226e+06
bac.072	CHNF JP 4a t2	10	1	500	10	510	Med	52.1	19832	38.0653	CHNF JP 4a t2																			135.413	32.2572	1.35413e+07	3.22572e+06
bac.073	CHNF JP 4b t2	10	1	500	10	510	Med	52.1	29896	57.382	CHNF JP 4b t2
bac.074	CHNF JP 4c t2	10	1	500	10	510	Med	52.1	28636	54.9635	CHNF JP 4c t2
bac.075	CHNF JP 5a t2	10	1	500	10	510	Med	52.1	17131	32.881	CHNF JP 5a t2
bac.076	CHNF JP 5b t2	10	1	500	10	510	Med	52.1	15910	30.5374	CHNF JP 5b t2
bac.077	CHNF JP 5c t2	10	1	500	10	510	Med	52.1	17834	34.2303	CHNF JP 5c t2
bac.078	CHNF JP 6a t2	10	1	500	10	510	Med	52.1	14863	28.5278	CHNF JP 6a t2
bac.079	CHNF JP 6b t2	10	1	500	10	510	Med	52.1	15178	29.1324	CHNF JP 6b t2
bac.080	CHNF JP 6c t2	10	1	500	10	510	Med	52.1	14614	28.0499	CHNF JP 6c t2
bac.092	CHNF SB 1a t0	100	1	500	10	510	Med	52.1	6370	122.265	CHNF SB 1a t0
bac.093	CHNF SB 1b t0	100	1	500	10	510	Med	52.1	6362	122.111	CHNF SB 1b t0
bac.094	CHNF SB 1c t0	100	1	500	10	510	Med	52.1	6473	124.242	CHNF SB 1c t0
bac.095	CHNF SB 2a t0	100	1	500	10	510	Med	52.1	6990	134.165	CHNF SB 2a t0				Both SW+L treatments have the most Bac growth (makes sense). I think there was some mistake with SB T=1… recommend doing T=0 and T=end only for figures.
bac.096	CHNF SB 2b t0	100	1	500	10	510	Med	52.1	6459	123.973	CHNF SB 2b t0
bac.097	CHNF SB 2c t0	100	1	500	10	510	Med	52.1	6604	126.756	CHNF SB 2c t0
bac.098	CHNF SB 3a t0	100	1	500	10	510	Med	52.1	16130	309.597	CHNF SB 3a t0
bac.099	CHNF SB 3b t0	100	1	500	10	510	Med	52.1	6297	120.864	CHNF SB 3b t0
bac.100	CHNF SB 3c t0	100	1	500	10	510	Med	52.1	6148	118.004	CHNF SB 3c t0
bac.112	CHNF JP 4a t0	10	1	500	10	510	Med	52.1	7433	14.2668	CHNF JP 4a t0
bac.113	CHNF JP 4b t0	10	1	500	10	510	Med	52.1	7448	14.2956	CHNF JP 4b t0
bac.114	CHNF JP 4c t0	10	1	500	10	510	Med	52.1	7567	14.524	CHNF JP 4c t0
bac.115	CHNF JP 5a t0	10	1	500	10	510	Med	52.1	7568	14.5259	CHNF JP 5a t0
bac.116	CHNF JP 5b t0	10	1	500	10	510	Med	52.1	7546	14.4837	CHNF JP 5b t0
bac.117	CHNF JP 5c t0	10	1	500	10	510	Med	52.1	7430	14.261	CHNF JP 5c t0
bac.118	CHNF JP 6a t0	10	1	500	10	510	Med	52.1	7230	13.8772	CHNF JP 6a t0
bac.119	CHNF JP 6b t0	10	1	500	10	510	Med	52.1	7719	14.8157	CHNF JP 6b t0
bac.120	CHNF JP 6c t0	10	1	500	10	510	Med	52.1	7583	14.5547	CHNF JP 6c t0
bac.133	CHNF SB 1a t3	100	1	500	10	510	Med	52.1	9725	186.66	CHNF SB 1a t3
bac.134	CHNF SB 1b t3	100	1	500	10	510	Med	52.1	9519	182.706	CHNF SB 1b t3
bac.135	CHNF SB 1c t3	100	1	500	10	510	Med	52.1	9639	185.01	CHNF SB 1c t3
bac.136	CHNF SB 2a t3	100	1	500	10	510	Med	52.1	8148	156.392	CHNF SB 2a t3
bac.137	CHNF SB 2b t3	100	1	500	10	510	Med	52.1	7611	146.084	CHNF SB 2b t3
bac.138	CHNF SB 2c t3	100	1	500	10	510	Med	52.1	7254	139.232	CHNF SB 2c t3
bac.139	CHNF SB 3a t3	100	1	500	10	510	Med	52.1	6907	132.572	CHNF SB 3a t3
bac.140	CHNF SB 3b t3	100	1	500	10	510	Med	52.1	6832	131.132	CHNF SB 3b t3
bac.141	CHNF SB 3c t3	100	1	500	10	510	Med	52.1	7055	135.413	CHNF SB 3c t3
bac.142	CHNF SB 3a t0	100	1	500	10	510	Med	52.1	6172	118.464	CHNF SB 3a t0
bac.154	CHNF JP 4a t3	10	1	500	10	510	Med	52.1	25907	49.7255	CHNF JP 4a t3
bac.155	CHNF JP 4b t3	10	1	500	10	510	Med	52.1	35289	67.7332	CHNF JP 4b t3
bac.156	CHNF JP 4c t3	10	1	500	10	510	Med	52.1	32711	62.785	CHNF JP 4c t3
bac.157	CHNF JP 5a t3	10	1	500	10	510	Med	52.1	18403	35.3225	CHNF JP 5a t3
bac.158	CHNF JP 5b t3	10	1	500	10	510	Med	52.1	19078	36.618	CHNF JP 5b t3
bac.159	CHNF JP 5c t3	10	1	500	10	510	Med	52.1	24914	47.8196	CHNF JP 5c t3
bac.160	CHNF JP 6a t3	10	1	500	10	510	Med	52.1	16245	31.1804	CHNF JP 6a t3
bac.161	CHNF JP 6b t3	10	1	500	10	510	Med	52.1	16788	32.2226	CHNF JP 6b t3
bac.162	CHNF JP 6c t3	10	1	500	10	510	Med	52.1	16806	32.2572	CHNF JP 6c t3
bac.167	PWH3a pre-phage 26Aug13	100	1	500	10	510	Med	52.1	41103	788.925	PWH3a pre-phage 26Aug13
bac.168	PWH3a + phage 26Aug13	1000	1	500	10	510	Med	52.1	3323	637.812	PWH3a + phage 26Aug13
												PWH3a pre-phage		7.88925e+10	cells/L
							(from lab book B6:123)					PWH3a post-phage		6.37812e+10	cells/L
							Phage conc in stock		20230000000000	P1/L		# PWH3a that lysed		1.51113e+10	cells/L
							Phage added		1.16	ml		cell N quota		2.54	fmol/cell
							Vol. PWH3a		60	ml				3.83828e+10	fmol/L
							Phage conc in PWH3a		3.91113e+11	P1/L		N conc in Lys		38.3828	umol/L
							PWH3a pre-phage		7.88925e+10	cells/L		N conc in SW+L		0.43866	umol/L
							MOI		4.95755			(added 8ml to 700ml)
														1.42857
														0.307062

## Sheet: PP
	Sample ID	Dilution factor	Acquisition time (min)	Sample volume (µl)	Flow mode	Flow rate (µl min-1)	HNA (events)	HNA (104 ml-1)	Sample ID
					High	75.2
pp.001	CHNF SB 1a t1	1	1	500	High	75.2	1244	1.65426	CHNF SB 1a t1																						SB
pp.002	CHNF SB 1a t1	1	1	500	High	75.2	1185	1.5758	CHNF SB 1a t1				0	6.5	19.5	25.5	Increase		SB	JP	SB	JP			SW+L	SW+N	SW				Anova: Single Factor
pp.003	CHNF SB 1b t1	1	1	500	High	75.2	1225	1.62899	CHNF SB 1b t1			1a	1.75133	1.5758	3.09176	3.67553	1.9242	For R:	1.75133	1.88032	17513.3	18803.2	SB	a	1.9242	4.4109	2.14495
pp.004	CHNF SB 1c t1	1	1	500	High	75.2	1225	1.62899	CHNF SB 1c t1			1b	1.75133	1.62899	3.26995	3.93617	2.18484		1.75133	1.75532	17513.3	17553.2		b	2.18484	4.75798	1.38298				SUMMARY
pp.005	CHNF SB 2a t1	1	1	500	High	75.2	1191	1.58378	CHNF SB 2a t1			1c	1.74202	1.62899	3.14362	3.87234	2.13032		1.74202	2.03191	17420.2	20319.1		c	2.13032	2.15559	0.621011				Groups	Count	Sum	Average	Variance
pp.006	CHNF SB 2b t1	1	1	500	High	75.2	1190	1.58245	CHNF SB 2b t1			2a	1.60904	1.58378	5.03989	6.01995	4.4109		1.8258	1.72473	18258	17247.3									SW+L	3	6.23936	2.07979	0.0188982
pp.007	CHNF SB 2c t1	1	1	500	High	75.2	1043	1.38697	CHNF SB 2c t1			2b	1.63963	1.58245	5.29388	6.39761	4.75798		1.57846	1.92287	15784.6	19228.7			SW+L	SW+N	SW				SW+N	3	11.3245	3.77482	1.99656
pp.008	CHNF SB 3a t1	1	1	500	High	75.2	1059	1.40824	CHNF SB 3a t1			2c	1.63697	1.38697	3.21011	3.79255	2.15559		1.57048	1.98271	15704.8	19827.1	JP	a	-0.422872	0.453457	0.119681				SW	3	4.14894	1.38298	0.580595
pp.009	CHNF SB 3b t1	1	1	500	High	75.2	1086	1.44415	CHNF SB 3b t1			3a	1.8258	1.40824	3.4375	3.97074	2.14495		1.5758	1.72207	15758	17220.7		b	1.29388	-0.117021	-0.0611702
pp.010	CHNF SB 3c t1	1	1	500	High	75.2	1089	1.44814	CHNF SB 3c t1			3b	1.57846	1.44415	2.27527	2.96144	1.38298		1.62899	1.94415	16289.9	19441.5		c	2.12234	-1.01596	-0.275266
pp.011	CHNF JP 4a t1	1	1	500	High	75.2	1295	1.72207	CHNF JP 4a t1			3c	1.57048	1.44814	1.7633	2.19149	0.621011		1.62899	2.25133	16289.9	22513.3									ANOVA
pp.012	CHNF JP 4b t1	1	1	500	High	75.2	1462	1.94415	CHNF JP 4b t1			4a	1.88032	1.72207	1.54654	1.45745	-0.422872		1.40824	1.9242	14082.4	19242									Source of Variation	SS	df	MS	F	P-value	F crit
pp.013	CHNF JP 4c t1	1	1	500	High	75.2	1693	2.25133	CHNF JP 4c t1			4b	1.75532	1.94415	2.52527	3.0492	1.29388		1.44415	1.95479	14441.5	19547.9									Between Groups	9.0796	2	4.5398	5.24619	0.0481508	5.14325
pp.014	CHNF JP 5a t1	1	1	500	High	75.2	1306	1.7367	CHNF JP 5a t1			4c	2.03191	2.25133	3.4641	4.15426	2.12234		1.44814	1.94149	14481.4	19414.9									Within Groups	5.19211	6	0.865352
pp.015	CHNF JP 5c t1_1	1	1	500	High	75.2	1257	1.67154	CHNF JP 5c t1_1			5a	1.87766	1.7367	2.09043	2.33112	0.453457		3.09176	1.54654	30917.6	15465.4
pp.016	CHNF JP 5c t1_2	1	1	500	High	75.2	1558	2.07181	CHNF JP 5c t1_2			5b	1.84176	1.67154	1.83511	1.72473	-0.117021		3.26995	2.52527	32699.5	25252.7									Total	14.2717	8
pp.017	CHNF JP 6a t1	1	1	500	High	75.2	1447	1.9242	CHNF JP 6a t1			5c	1.98803	2.07181	1.39495	0.972074	-1.01596		3.14362	3.4641	31436.2	34641
pp.018	CHNF JP 6b t1	1	1	500	High	75.2	1470	1.95479	CHNF JP 6b t1			6a	1.72473	1.9242	2.07713	1.84441	0.119681		3.4375	2.07713	34375	20771.3									JP
pp.019	CHNF JP 6c t1	1	1	500	High	75.2	1460	1.94149	CHNF JP 6c t1			6b	1.92287	1.95479	1.89495	1.8617	-0.0611702		2.27527	1.89495	22752.7	18949.5									Anova: Single Factor
pp.020	CHNF SB 1a t0	1	1	500	High	75.2	1317	1.75133	CHNF SB 1a t0			6c	1.98271	1.94149	1.80718	1.70745	-0.275266		1.7633	1.80718	17633	18071.8
pp.021	CHNF SB 1b t0	1	1	500	High	75.2	1317	1.75133	CHNF SB 1b t0										3.67553	1.45745	36755.3	14574.5									SUMMARY
pp.022	CHNF SB 1c t0	1	1	500	High	75.2	1310	1.74202	CHNF SB 1c t0										3.93617	3.0492	39361.7	30492									Groups	Count	Sum	Average	Variance
pp.023	CHNF SB 2a t0	1	1	500	High	75.2	1210	1.60904	CHNF SB 2a t0				0	6.5	19.5	25.5	Increase		3.87234	4.15426	38723.4	41542.6									SW+L	3	2.99335	0.997784	1.68528
pp.024	CHNF SB 2b t0	1	1	500	High	75.2	1233	1.63963	CHNF SB 2b t0		SB	SW+L	1.74823	1.61126	3.16844	3.82801	2.07979		3.97074	1.84441	39707.4	18444.1									SW+N	3	-0.679521	-0.226507	0.548785
pp.025	CHNF SB 2c t0	1	1	500	High	75.2	1231	1.63697	CHNF SB 2c t0			SW+N	1.62855	1.51773	4.51463	5.40337	3.77482		2.96144	1.8617	29614.4	18617									SW	3	-0.216755	-0.0722518	0.0390878
pp.026	CHNF SB 3a t0	1	1	500	High	75.2	1373	1.8258	CHNF SB 3a t0			SW	1.65824	1.43351	2.49202	3.04122	1.38298		2.19149	1.70745	21914.9	17074.5
pp.027	CHNF SB 3b t0	1	1	500	High	75.2	1187	1.57846	CHNF SB 3b t0		JP	SW+L	1.88918	1.97252	2.51197	2.88697	0.997784
pp.028	CHNF SB 3c t0	1	1	500	High	75.2	1181	1.57048	CHNF SB 3c t0			SW+N	1.90248	1.82668	1.77349	1.67598	-0.226507														ANOVA
pp.029	CHNF JP 4a t0	1	1	500	High	75.2	1414	1.88032	CHNF JP 4a t0			SW	1.87677	1.94016	1.92642	1.80452	-0.0722518														Source of Variation	SS	df	MS	F	P-value	F crit
pp.030	CHNF JP 4b t0	1	1	500	High	75.2	1320	1.75532	CHNF JP 4b t0																						Between Groups	2.66766	2	1.33383	1.76032	0.250296	5.14325
pp.031	CHNF JP 4c t0	1	1	500	High	75.2	1528	2.03191	CHNF JP 4c t0			SW+L	0.00310284	0.0177305	0.0529156	0.0784362	0.0793687														Within Groups	4.54631	6	0.757719
pp.032	CHNF JP 5a t0	1	1	500	High	75.2	1412	1.87766	CHNF JP 5a t0			SW+N	0.00978195	0.0653823	0.656369	0.812753	0.815795
pp.033	CHNF JP 5b t0	1	1	500	High	75.2	1385	1.84176	CHNF JP 5b t0			SW	0.0838083	0.0126854	0.495303	0.515174	0.439922														Total	7.21397	8
pp.034	CHNF JP 5c t0	1	1	500	High	75.2	1495	1.98803	CHNF JP 5c t0			SW+L	0.0799693	0.15344	0.55359	0.782716	0.749507
pp.035	CHNF JP 6a t0	1	1	500	High	75.2	1297	1.72473	CHNF JP 6a t0			SW+N	0.0440126	0.123997	0.203117	0.393079	0.427701
pp.036	CHNF JP 6b t0	1	1	500	High	75.2	1446	1.92287	CHNF JP 6b t0			SW	0.0779575	0.00885416	0.0794998	0.0487931	0.114146
pp.037	CHNF JP 6c t0	1	1	500	High	75.2	1491	1.98271	CHNF JP 6c t0																						Notes: Highest growth in SW+N for SB
pp.038	CHNF SB 1a t2	1	1	500	High	75.2	2325	3.09176	CHNF SB 1a t2																						Notes: No significant differences between increases in JP.
pp.039	CHNF SB 1b t2	1	1	500	High	75.2	2459	3.26995	CHNF SB 1b t2
pp.040	CHNF SB 1c t2	1	1	500	High	75.2	2364	3.14362	CHNF SB 1c t2
pp.041	CHNF SB 2a t2	1	1	500	High	75.2	3790	5.03989	CHNF SB 2a t2
pp.042	CHNF SB 2b t2	1	1	500	High	75.2	3981	5.29388	CHNF SB 2b t2
pp.043	CHNF SB 2c t2	1	1	500	High	75.2	2414	3.21011	CHNF SB 2c t2
pp.044	CHNF SB 3a t2	1	1	500	High	75.2	2585	3.4375	CHNF SB 3a t2
pp.045	CHNF SB 3b t2	1	1	500	High	75.2	1711	2.27527	CHNF SB 3b t2
pp.046	CHNF SB 3c t2	1	1	500	High	75.2	1326	1.7633	CHNF SB 3c t2
pp.047	CHNF JP 4a t2	1	1	500	High	75.2	1163	1.54654	CHNF JP 4a t2
pp.048	CHNF JP 4b t2	1	1	500	High	75.2	1899	2.52527	CHNF JP 4b t2
pp.049	CHNF JP 4c t2	1	1	500	High	75.2	2605	3.4641	CHNF JP 4c t2
pp.050	CHNF JP 5a t2	1	1	500	High	75.2	1572	2.09043	CHNF JP 5a t2
pp.051	CHNF JP 5b t2	1	1	500	High	75.2	1380	1.83511	CHNF JP 5b t2
pp.052	CHNF JP 5c t2	1	1	500	High	75.2	1049	1.39495	CHNF JP 5c t2
pp.053	CHNF JP 6a t2	1	1	500	High	75.2	1562	2.07713	CHNF JP 6a t2						pre	post	fold decrease
pp.054	CHNF JP 6b t2	1	1	500	High	75.2	1425	1.89495	CHNF JP 6b t2				SB	a	3.67553	0.825798	4.45089
pp.055	CHNF JP 6c t2	1	1	500	High	75.2	1359	1.80718	CHNF JP 6c t2					b	3.93617	0.993351	3.96252
pp.056	CHNF SB SW+L A post-filt.	1	1	500	High	75.2	621	0.825798	CHNF SB SW+L A post-filt.					c	3.87234	0.961436	4.02766
pp.057	CHNF SB SW+L B post-filt.	1	1	500	High	75.2	747	0.993351	CHNF SB SW+L B post-filt.				JP	a	1.45745	0.452128	3.22353
pp.058	CHNF SB SW+L C post-filt.	1	1	500	High	75.2	723	0.961436	CHNF SB SW+L C post-filt.					b	3.0492	0.855718	3.56333
pp.059	CHNF JP SW+L A post-filt.	1	1	500	High	75.2	340	0.452128	CHNF JP SW+L A post-filt.					c	4.15426	1.33378	3.11466
pp.060	CHNF JP SW+L B post-filt.	1	2	500	High	75.2	1287	0.855718	CHNF JP SW+L B post-filt.
pp.061	CHNF JP SW+L C post-filt.	1	2	500	High	75.2	2006	1.33378	CHNF JP SW+L C post-filt.
pp.062	CHNF SB 1a t3	1	1	500	High	75.2	2764	3.67553	CHNF SB 1a t3
pp.063	CHNF SB 1b t3	1	1	500	High	75.2	2960	3.93617	CHNF SB 1b t3
pp.064	CHNF SB 1c t3	1	1	500	High	75.2	2912	3.87234	CHNF SB 1c t3
pp.065	CHNF SB 2a t3	1	1	500	High	75.2	4527	6.01995	CHNF SB 2a t3
pp.066	CHNF SB 2b t3	1	1	500	High	75.2	4811	6.39761	CHNF SB 2b t3
pp.067	CHNF SB 2c t3	1	1	500	High	75.2	2852	3.79255	CHNF SB 2c t3
pp.068	CHNF SB 3a t3	1	1	500	High	75.2	2986	3.97074	CHNF SB 3a t3
pp.069	CHNF SB 3b t3	1	1	500	High	75.2	2227	2.96144	CHNF SB 3b t3
pp.070	CHNF SB 3c t3	1	1	500	High	75.2	1648	2.19149	CHNF SB 3c t3
pp.071	CHNF JP 4a t3	1	1	500	High	75.2	1096	1.45745	CHNF JP 4a t3
pp.072	CHNF JP 4b t3	1	1	500	High	75.2	2293	3.0492	CHNF JP 4b t3
pp.073	CHNF JP 4c t3	1	1	500	High	75.2	3124	4.15426	CHNF JP 4c t3
pp.074	CHNF JP 5a t3	1	1	500	High	75.2	1753	2.33112	CHNF JP 5a t3
pp.075	CHNF JP 5b t3	1	1	500	High	75.2	1297	1.72473	CHNF JP 5b t3
pp.076	CHNF JP 5c t3	1	1	500	High	75.2	731	0.972074	CHNF JP 5c t3
pp.077	CHNF JP 6a t3	1	1	500	High	75.2	1387	1.84441	CHNF JP 6a t3
pp.078	CHNF JP 6b t3	1	1	500	High	75.2	1400	1.8617	CHNF JP 6b t3
pp.079	CHNF JP 6c t3	1	1	500	High	75.2	1284	1.70745	CHNF JP 6c t3

## Sheet: Virus
	Sample ID	Dilution factor	Acquisition time (min)	Sample volume (µl)	SYBR Green (µl)	Total volume (µl)	Flow mode	Flow rate (µl min-1)	Blank	HNA (events)	HNA (106 ml-1)	Sample ID
							High
							Med	52.1
vir.001	TE 1		1	500	10	510	Med	52.1		253	0	TE 1
vir.002	TE 2		1	500	10	510	Med	52.1		176	0	TE 2
vir.003	CHNF SB 1a t1	1000	1	500	10	510	Med	52.1	176	5350	99.309	CHNF SB 1a t1
vir.004	CHNF SB 1b t1	1000	1	500	10	510	Med	52.1	176	4317	79.4818	CHNF SB 1b t1		SB		0	6.5	19.5	25.5
vir.005	CHNF SB1ca t1	1000	1	500	10	510	Med	52.1	176	4262	78.4261	CHNF SB 1c t1			1a	73.0806	99.309	80.1344	90.3666
vir.006	CHNF SB 2a t1	100	1	500	10	510	Med	52.1	176	36133	69.0154	CHNF SB 2a t1			1b	74.5758	79.4818	80.2111	90.6238
vir.007	CHNF SB 2b t1	100	1	500	10	510	Med	52.1	176	37659	71.9443	CHNF SB 2b t1			1c	73.4012	78.4261	80.6718	89.3589
vir.008	CHNF SB 2c t1	100	1	500	10	510	Med	52.1	176	35477	67.7562	CHNF SB 2c t1			2a	74.5969	69.0154	71.5221	75.1996
vir.009	CHNF SB 3a t1	100	1	500	10	510	Med	52.1	176	34637	66.144	CHNF SB 3a t1			2b	65.3839	71.9443	72.6488	75.6488
vir.010	CHNF SB 3b t1	100	1	500	10	510	Med	52.1	176	34710	66.2841	CHNF SB 3b t1			2c	69.405	67.7562	76.7025	82.2169
vir.011	CHNF SB 3c t1	100	1	500	10	510	Med	52.1	176	35177	67.1804	CHNF SB 3c t1			3a	58.6104	66.144	74.8772	76.2418
vir.021	TE 1		1	500	10	510	Med	52.1		654	0	TE 1			3b	65.5163	66.2841	73.6891	76.8887
vir.022	TE 2		1	500	10	510	Med	52.1		410	0	TE 2			3c	65.1344	67.1804	75.9347	78.5624
vir.023	CHNF JP 4a t1	1000	1	500	10	510	Med	52.1	410	2251	35.3359	CHNF JP 4a t1
vir.024	CHNF JP 4b t1	1000	1	500	10	510	Med	52.1	410	2110	32.6296	CHNF JP 4b t1		JP		0	6.5	19.5	25.5
vir.025	CHNF JP 4c t1	1000	1	500	10	510	Med	52.1	410	1991	30.3455	CHNF JP 4c t1			4a	33.666	35.3359	36.7639	41.9616
vir.026	CHNF JP 5a t1	100	1	500	10	510	Med	52.1	410	16090	30.096	CHNF JP 5a t1			4b	32.0614	32.6296	39.5336	43.81
vir.027	CHNF JP 5b t1	100	1	500	10	510	Med	52.1	410	16413	30.7159	CHNF JP 5b t1			4c	33.6603	30.3455	36.4069	43.38
vir.028	CHNF JP 5c t1	100	1	500	10	510	Med	52.1	410	15842	29.62	CHNF JP 5c t1			5a	27.9328	30.096	35.1382	32.8964
vir.029	CHNF JP 6a t1	100	1	500	10	510	Med	52.1	410	15313	28.6046	CHNF JP 6a t1			5b	26.7236	30.7159	33.5624	36.6699
vir.030	CHNF JP 6b t1	100	1	500	10	510	Med	52.1	410	15505	28.9731	CHNF JP 6b t1			5c	32.0173	29.62	30.5777	36.4741
vir.031	CHNF JP 6c t1	100	1	500	10	510	Med	52.1	410	16437	30.762	CHNF JP 6c t1			6a	27.2572	28.6046	33.1555	35.5393
vir.041	TE 1		1	500	10	510	Med	52.1		989	0	TE 1			6b	28.2284	28.9731	32.9923	34.0729
vir.042	TE 2		1	500	10	510	Med	52.1		723	0	TE 2			6c	27.3436	30.762	31.6276	33.8196
vir.043	CHNF SB 1a t2	1000	1	500	10	510	Med	52.1	723	4898	80.1344	CHNF SB 1a t2
vir.044	CHNF SB 1b t2	1000	1	500	10	510	Med	52.1	723	4902	80.2111	CHNF SB 1b t2
vir.045	CHNF SB 1c t2	1000	1	500	10	510	Med	52.1	723	4926	80.6718	CHNF SB 1c t2
vir.046	CHNF SB 2a t2	100	1	500	10	510	Med	52.1	723	37986	71.5221	CHNF SB 2a t2
vir.047	CHNF SB 2b t2	100	1	500	10	510	Med	52.1	723	38573	72.6488	CHNF SB 2b t2
vir.048	CHNF SB 2c t2	100	1	500	10	510	Med	52.1	723	40685	76.7025	CHNF SB 2c t2
vir.049	CHNF SB 3a t2	100	1	500	10	510	Med	52.1	723	39734	74.8772	CHNF SB 3a t2
vir.050	CHNF SB 3b t2	100	1	500	10	510	Med	52.1	723	39115	73.6891	CHNF SB 3b t2
vir.051	CHNF SB 3c t2	100	1	500	10	510	Med	52.1	723	40285	75.9347	CHNF SB 3c t2
vir.061	TE 1		1	500	10	510	Med	52.1		481	0	TE 1
vir.062	TE 2		1	500	10	510	Med	52.1		444	0	TE 2
vir.063	CHNF JP 4a t2	100	1	500	10	510	Med	52.1	444	19598	36.7639	CHNF JP 4a t2
vir.064	CHNF JP 4b t2	100	1	500	10	510	Med	52.1	444	21041	39.5336	CHNF JP 4b t2
vir.065	CHNF JP 4c t2	100	1	500	10	510	Med	52.1	444	19412	36.4069	CHNF JP 4c t2
vir.066	CHNF JP 5a t2	100	1	500	10	510	Med	52.1	444	18751	35.1382	CHNF JP 5a t2
vir.067	CHNF JP 5b t2	100	1	500	10	510	Med	52.1	444	17930	33.5624	CHNF JP 5b t2
vir.068	CHNF JP 5c t2	100	1	500	10	510	Med	52.1	444	16375	30.5777	CHNF JP 5c t2
vir.069	CHNF JP 6a t2	100	1	500	10	510	Med	52.1	444	17718	33.1555	CHNF JP 6a t2
vir.070	CHNF JP 6b t2	100	1	500	10	510	Med	52.1	444	17633	32.9923	CHNF JP 6b t2
vir.071	CHNF JP 6c t2	100	1	500	10	510	Med	52.1	444	16922	31.6276	CHNF JP 6c t2
vir.081	TE 1		1	500	10	510	Med	52.1		1293	0	TE 1
vir.082	TE 2		1	500	10	510	Med	52.1		712	0	TE 2
vir.083	CHNF SB 1a t0	100	1	500	10	510	Med	52.1	712	38787	73.0806	CHNF SB 1a t0
vir.084	CHNF SB 1b t0	100	1	500	10	510	Med	52.1	712	39566	74.5758	CHNF SB 1b t0
vir.085	CHNF SB 1c t0	100	1	500	10	510	Med	52.1	712	38954	73.4012	CHNF SB 1c t0
vir.086	CHNF SB 2a t0	100	1	500	10	510	Med	52.1	712	39577	74.5969	CHNF SB 2a t0
vir.087	CHNF SB 2b t0	100	1	500	10	510	Med	52.1	712	34777	65.3839	CHNF SB 2b t0
vir.088	CHNF SB 2c t0	100	1	500	10	510	Med	52.1	712	36872	69.405	CHNF SB 2c t0
vir.089	CHNF SB 3a t0	100	1	500	10	510	Med	52.1	712	67184	127.585	CHNF SB 3a t0
vir.090	CHNF SB 3b t0	100	1	500	10	510	Med	52.1	712	34846	65.5163	CHNF SB 3b t0
vir.091	CHNF SB 3c t0	100	1	500	10	510	Med	52.1	712	34647	65.1344	CHNF SB 3c t0
vir.101	TE 1		1	500	10	510	Med	52.1		550	0	TE 1
vir.102	TE 2		1	500	10	510	Med	52.1		495	0	TE 2
vir.103	CHNF JP 4a t0	100	1	500	10	510	Med	52.1	495	18035	33.666	CHNF JP 4a t0
vir.104	CHNF JP 4b t0	100	1	500	10	510	Med	52.1	495	17199	32.0614	CHNF JP 4b t0
vir.105	CHNF JP 4c t0	100	1	500	10	510	Med	52.1	495	18032	33.6603	CHNF JP 4c t0
vir.106	CHNF JP 5a t0	100	1	500	10	510	Med	52.1	495	15048	27.9328	CHNF JP 5a t0
vir.107	CHNF JP 5b t0	100	1	500	10	510	Med	52.1	495	14418	26.7236	CHNF JP 5b t0
vir.108	CHNF JP 5c t0	100	1	500	10	510	Med	52.1	495	17176	32.0173	CHNF JP 5c t0
vir.109	CHNF JP 6a t0	100	1	500	10	510	Med	52.1	495	14696	27.2572	CHNF JP 6a t0
vir.110	CHNF JP 6b t0	100	1	500	10	510	Med	52.1	495	15202	28.2284	CHNF JP 6b t0
vir.111	CHNF JP 6c t0	100	1	500	10	510	Med	52.1	495	14741	27.3436	CHNF JP 6c t0
vir.121	TE 1		1	500	10	510	Med	52.1		1788	0	TE 1
vir.122	TE 2		1	500	10	510	Med	52.1		811	0	TE 2
vir.123	CHNF SB 1a t3	100	1	500	10	510	Med	52.1	811	47892	90.3666	CHNF SB 1a t3
vir.124	CHNF SB 1b t3	100	1	500	10	510	Med	52.1	811	48026	90.6238	CHNF SB 1b t3
vir.125	CHNF SB 1c t3	100	1	500	10	510	Med	52.1	811	47367	89.3589	CHNF SB 1c t3
vir.126	CHNF SB 2a t3	100	1	500	10	510	Med	52.1	811	39990	75.1996	CHNF SB 2a t3
vir.127	CHNF SB 2b t3	100	1	500	10	510	Med	52.1	811	40224	75.6488	CHNF SB 2b t3
vir.128	CHNF SB 2c t3	100	1	500	10	510	Med	52.1	811	43646	82.2169	CHNF SB 2c t3
vir.129	CHNF SB 3a t3	100	1	500	10	510	Med	52.1	811	40533	76.2418	CHNF SB 3a t3
vir.130	CHNF SB 3b t3	100	1	500	10	510	Med	52.1	811	40870	76.8887	CHNF SB 3b t3
vir.131	CHNF SB 3c t3	100	1	500	10	510	Med	52.1	811	41742	78.5624	CHNF SB 3c t3
vir.132	CHNF SB 3a t0	100	1	500	10	510	Med	52.1	811	31347	58.6104	CHNF SB 3a t0
vir.143	TE 1		1	500	10	510	Med	52.1		1739	0	TE 1
vir.144	TE 2		1	500	10	510	Med	52.1		1284	0	TE 2
vir.145	CHNF JP 4a t3	100	1	500	10	510	Med	52.1	1284	23146	41.9616	CHNF JP 4a t3
vir.146	CHNF JP 4b t3	100	1	500	10	510	Med	52.1	1284	24109	43.81	CHNF JP 4b t3
vir.147	CHNF JP 4c t3	100	1	500	10	510	Med	52.1	1284	23885	43.38	CHNF JP 4c t3
vir.148	CHNF JP 5a t3	100	1	500	10	510	Med	52.1	1284	18423	32.8964	CHNF JP 5a t3
vir.149	CHNF JP 5b t3	100	1	500	10	510	Med	52.1	1284	20389	36.6699	CHNF JP 5b t3
vir.150	CHNF JP 5c t3	100	1	500	10	510	Med	52.1	1284	20287	36.4741	CHNF JP 5c t3
vir.151	CHNF JP 6a t3	100	1	500	10	510	Med	52.1	1284	19800	35.5393	CHNF JP 6a t3
vir.152	CHNF JP 6b t3	100	1	500	10	510	Med	52.1	1284	19036	34.0729	CHNF JP 6b t3
vir.153	CHNF JP 6c t3	100	1	500	10	510	Med	52.1	1284	18904	33.8196	CHNF JP 6c t3
vir.163	TE 1		1	500	10	510	Med	52.1		2982	0	TE 1
vir.164	TE 2		1	500	10	510	Med	52.1		1313	0	TE 2
vir.165	PWH3a pre-phage 26Aug13	1000	1	500	10	510	Med	52.1	1313	2594	24.5873	PWH3a pre-phage 26Aug13
vir.166	PWH3a + phage 26Aug13	10000	1	500	10	510	Med	52.1	1313	35777	6614.97	PWH3a + phage 26Aug13
vir.169	PWH3a pre-phage 26Aug13	100	1	500	10	510	Med	52.1	1313	35486	65.5912	PWH3a pre-phage 26Aug13

## Sheet: PP_Species
Phytoplankton Species
Semiahoo Bay
	Not a whole lot going on. The only things I see much of are the unidentifiable things (dark, feathery hairs around the perimeter or spread out like tentacles in one direction).
Jericho Pier
	Predominately a mixed diatom assemblage.

## Sheet: N-15
BOSTON UNIVERSITY STABLE ISOTOPE LABORATORY
DATA SHEET
Date: 19 September 2013							Samples Arrived: 9/14/13
Client: Emma Shelford							Job Number: 13N48
Project: University of British Columbia							Comments:
Data emailed: 9/20/13							File name: sh13N48.xls
Samples Returned/Archived: consumed
Data Location: Con 473									Expected 15N values:
										glycine	10.73
IMPORTANT DISCLAIMER: Due to a quirk in Excel, numbers are shown to 9 decimal places.										peptone	7.4
Values MUST be rounded to 2 decimal places. The accuracy of the data are reliable to 2 decimal places ONLY.
												Experiment	Treatment	Vol filt. (ml)	[N] (umol)	[N] (umol/ml)	[15N] taken up (umol/ml)	15N uptake (umol/L)
Tray	Sample	Wt	N Ht.	[N]	d15N	Atom %	Date	Comments
Location		(mg)	nA	(umoles)	(air)		Run
												Experiment	Treatment	Replicate	W/F	Label	Vol filt.	[N]	[N]	R	[15N] taken up	15N uptake
Tray 511D-05	glycine	0.207	24.7544	2.75743	10.8752		2013-09-17										(ml)	(umol)	(umol/ml)		(umol/ml)	(umol/L)
Tray 521A- 1	Filter S	1	0.428476	-0.27428	67.1988	0.390822	2013-09-17	Peak area below calibration curve.				SB	SW+N	A	whole	A	200	1.38937	0.00694685	0.0924618	0.000616504	0.616504
Tray 521A- 3	Filter A	1	14.5279	1.38937	24149.4	8.46362	2013-09-17					SB	SW+N	B	whole	B	100	0.638717	0.00638717	0.11185	0.00069067	0.69067
Tray 521A- 6	Filter D	1	6.78245	0.475451	38254.8	12.6119	2013-09-17					SB	SW+N	C	whole	C	100	0.359901	0.00359901	0.0995589	0.00034494	0.34494
Tray 521A- 7	Filter E	1	4.33186	0.186296	39375.9	12.9255	2013-09-17					SB	SW+L	A	whole	H	100	0.921906	0.00921906	0.068715	0.00059923	0.59923			SW+L	Fold decrease	SW+L F	Expected	SW+L W	Proportion
Tray 521A- 9	Filter G	1	11.0852	0.983156	3818.53	1.7407	2013-09-17					SB	SW+L	B	whole	J	100	0.88152	0.0088152	0.073451	0.000614728	0.614728		SB	a	4.45089	0.137635	0.612599	0.59923	1.02231
Tray 521A-11	glycine	0.21	29.0329	3.10087	12.8539	0.370994	2013-09-17					SB	SW+L	C	whole	L	100	0.840443	0.00840443	0.0720209	0.000574064	0.574064			b	3.96252	0.163916	0.649521	0.614728	1.0566
Tray 521B- 2	Filter K	1	11.887	1.07776	4569.34	2.00648	2013-09-17					SB	SW+L	A	filt.	G	100	0.983156	0.00983156	0.0177153	0.000137635	0.137635			c	4.02766	0.18063	0.727515	0.574064	1.26731
Tray 521B- 3	Filter L	1	9.87576	0.840443	18589.5	6.71824	2013-09-17					SB	SW+L	B	filt.	I	100	1.01602	0.0101602	0.0198493	0.000163916	0.163916		JP	a	3.22353	0.180546	0.581995	0.433015	1.34405
Tray 521B- 4	Filter M	1	11.6388	1.04847	4694.53	2.05066	2013-09-17					SB	SW+L	C	filt.	K	100	1.07776	0.0107776	0.0204757	0.00018063	0.18063			b	3.56333	0.19662	0.70062	0.572005	1.22485
Tray 521B- 5	Filter N	1	8.08048	0.628611	18747.2	6.76863	2013-09-17					JP	SW+N	A	whole	D	100	0.475451	0.00475451	0.14432	0.000668504	0.668504			c	3.11466	0.211738	0.659492
Tray 521B- 8	Filter Q	1	11.3263	1.0116	5703.94	2.40542	2013-09-17					JP	SW+N	B	whole	E	100	0.186296	0.00186296	0.148442	0.000269619	0.269619
Tray 521B- 9	Filter R	1	0		0		2013-09-17	Lost. Got stuck in autosampler and dropped into furnace				JP	SW+N	C	whole	F	100	0.173494	0.00173494	0.157048	0.000266022	0.266022			Therefore, all the SW+L W is from PP (prop>1)
Tray 521C- 1	glycine	0.216	29.7117	3.18096	14.1431	0.371465	2013-09-17	before I could grab it.				JP	SW+L	A	whole	N	100	0.628611	0.00628611	0.0726004	0.000433015	0.433015
Tray 521C- 2	peptone	0.179	20.5853	2.10411	7.97367	0.369213	2013-09-17					JP	SW+L	B	whole	P	100	0.795137	0.00795137	0.0756539	0.000572005	0.572005			SW+N information just tells me that there was indeed uptake of the N-15.
Tray 521C- 3	Filter T	1	0.91475	-0.216903	623.163	0.593216	2013-09-18	Peak area below calibration curve.				JP	SW+L	C	whole	R	100
Tray 521C- 4	Filter B	1	8.16613	0.638717	29422.9	10.0598	2013-09-18					JP	SW+L	A	filt.	M	100	1.04847	0.0104847	0.020936	0.000180546	0.180546				Average	StDev
Tray 521C- 5	Filter C	1	5.80317	0.359901	26079.8	9.05444	2013-09-18					JP	SW+L	B	filt.	O	100	1.14879	0.0114879	0.0208314	0.00019662	0.19662		SB	SW+L	0.596007	0.0118488					(from 13-09-03 Boston N-15 Results.xls)
Tray 521C- 6	Filter F	1	4.22336	0.173494	41716.8	13.5732	2013-09-18					JP	SW+L	C	filt.	Q	100	1.0116	0.010116	0.024647	0.000211738	0.211738			SW+N	0.550704	0.105086						Saanich Inlet	Fraser River Plume	Gorge Harbour
Tray 521C- 7	Filter H	1	10.5662	0.921906	17690.3	6.42969	2013-09-18								blank	S		-0.27428		0.00392356	0	0		JP	SW+L	0.50251	0.0567425					SW+Lys	1.66848	1.76088	4.15717	uM 15-N taken up
Tray 521C- 8	Filter I	1	11.3637	1.01602	4398.95	1.94629	2013-09-18								blank	T		-0.216903		0.00596756	0	0			SW+N	0.401382	0.133565					Range			0.360633
Tray 521C- 9	Filter J	1	10.2239	0.88152	18978.5	6.84251	2013-09-18
Tray 521C-10	Filter O	1	12.489	1.14879	4666.08	2.04063	2013-09-18
Tray 521C-11	Filter P	1	9.49179	0.795137	19577.7	7.03329	2013-09-18																										SI	FRP	GH	SB	JP
																																Average	1.66848	1.76088	4.15717	0.596007	0.50251
																	PP (cells/L)															Range/StDev			0.360633	0.0118488	0.0567425
																			T=end
																	SB	1a	3.67553e+07
																		1b	3.93617e+07
																		1c	3.87234e+07
																	JP	4a	1.45745e+07
																		4b	3.0492e+07
																		4c	4.15426e+07
																		cells/L	StDev	umol/L	StDev
																	SB	3.82801e+07	1.35855e+06	0.596007	0.0118488
																	JP	2.88697e+07	1.3557e+07	0.50251	0.0567425
																		fmol uptake per cell
																		15.5696	8.7216				So there is definitely evidence for uptake of Lys products.
																		17.4061	4.18546
																		(although this number is only for picophytoplankton!)
																																	2			1.42857
																																	SI	FRP	GH	SB	JP
																																	0.834242	0.880439	2.07859	0.417205	0.351757
																																				0.00829414	0.0397197
