# Supplementary material for: Virus-mediated transfer of nitrogen from heterotrophic bacteria to phytoplankton
Source: Copernicus journal article supplement (doi:10.5194/bg-15-809-2018), 2018-02-09
Supplement: Supplementary file 3 [file Shelford and Suttle 2018-SI and FRP Field Data.xlsx]

## Sheet: All-Info
Information
Station 1
Location:	Saanich Inlet
Exact location:	48o35.470N, 123o30.262W
Start of station:	7am
Water on deck:	8am
Depth:	Half 8m, half 7m (chl max)
Cast:	3
Bottle:	5 and 6
Notes:	Took ~1.5L of UF from integrated VC for PON rinsing
	Used 118um nitex to filter 3L water
	500ml in each whirlpak
	20ml of Lys A into each treatment 1 whirlpak
Samplings:	T0	10:15am	2012-09-13	0
	T1	4:30pm	2012-09-13	6.25
	T2	9:15pm	2012-09-13	11
	T3	7:15am	2012-09-14	21
	T4	6:15pm	2012-09-14	32
PON:	7:15pm 14-Sep-12
	Lugol's at this time (25ml in large falcon tube)
	Regular GFF filtering = 100ml each whirlpak (pushed through syringe)
	For treatment 1:
Phosphate	0.7475
Nitrate	1.237
Station 2
Location:	Fraser River Plume
Exact location:	49o04.274N, 123o24.069W
Start of station:	3pm
Water on deck:	4pm
Depth:	Half 6m, half 5m (chl max)
Cast:	2
Bottle:	6 and 7
Notes:	Took ~1L of UF from integrated VC for PON rinsing
	Used 118um nitex to filter 3L water
	500ml in each whirlpak
	20ml of Lys A into each treatment 1 whirlpak
Samplings:	T0	5:45pm	2012-09-13	0
	T1	9:15pm	2012-09-13	3.5
	T2	7:15am	2012-09-14	13.5
	T3	1:30pm	2012-09-14	19.75
	T4	8:45pm	2012-09-14	27
PON:	8:50pm 14-Sep-12
	Lugol's at this time (25ml in large falcon tube)
	Regular GFF filtering = 100ml each whirlpak (pushed through syringe)
Phosphate	1.1225
Nitrate	10.9065
Phosphate	1.797
Nitrate	16.9395

## Sheet: 1-NH4
Ammonium Station 1
0	23.6	24.4	23.2	23.7333								slope	530.3
0.05	46.3	46		46.15								y-int	13.759
0.1	71.6	74.4		73
0.25	137.8	138.1		137.95
0.5	249.4	249		249.2
1	649.9	470.3		560.1
			a	b	c	a	b	c	average	stdev				0	6.25	11	21	32
	1	t0	444.4	443.8	434.6	0.812071	0.810939	0.79359	0.805533	0.0103583			SW+L	0.805533	0.435303	0.176393	0.130569	0.104924
	2	t0	308.6	305.5	288.6	0.555989	0.550143	0.518275	0.541469	0.0202985			SW	0.541469	0.17765	0.0421918	0.0286146	0.0347747
	1	t1	288.8	222.9	222.1	0.518652	0.394382	0.392874	0.435303	0.0721863
	2	t1	116.4	110.1	97.4	0.193553	0.181673	0.157724	0.17765	0.01825				0.00598039	0.0416768	0.012526	0.0113149	0.00549563
	1	t2	119	106.9	96	0.198456	0.175638	0.155084	0.176393	0.0216957				0.0117193	0.0105366	0.0120541	0.00734573	0.0021856
	2	t2	48.8	31.3	28.3	0.0660777	0.0330775	0.0274203	0.0421918	0.0208782
	1	t3	73.5	81.4	94.1	0.112655	0.127552	0.151501	0.130569	0.0195979
	2	t3	36.6	26.3	23.9	0.0430718	0.0236489	0.0191231	0.0286146	0.0127232
	1	t4	75	65.2	68	0.115484	0.0970036	0.102284	0.104924	0.00951871
	2	t4	32.4	34.1	30.1	0.0351518	0.0383575	0.0308146	0.0347747	0.00378557
					For R:	0.812071
						0.810939
						0.79359
						0.555989
						0.550143
						0.518275
						0.518652
						0.394382
						0.392874
						0.193553		Drawdown	A	B	C	Ave	StDev
						0.181673		SW+Lys	0.696587	0.713936	0.691307	0.70061	0.0118386
						0.157724		SW	0.520837	0.511786	0.48746	0.506694	0.0172613
						0.198456
						0.175638					8.81976e-05
						0.155084
						0.0660777
						0.0330775
						0.0274203
						0.112655
						0.127552
						0.151501
						0.0430718
						0.0236489
						0.0191231
						0.115484
						0.0970036
						0.102284
						0.0351518
						0.0383575
						0.0308146

## Sheet: 1-Bac
File name	Sample ID	Dilution factor	Acquisition time (min)	Sample volume (µl)	SYBR Green (µl)	Total volume (µl)	Flow mode	Flow rate (µl min-1)	HNA (events)	HNA (105 ml-1)
							Med	51.1
bac.012	SOG12-1 1a t0	10	1	500	10	510	Med	51.1	5651	11.2799	SOG12-1 1a t0				0	6.25	11	21	32		For R:	11.2799	1.12799e+06
bac.013	SOG12-1 1b t0	10	1	500	10	510	Med	51.1	5658	11.2939	SOG12-1 1b t0			1a	11.2799	16.342	27.4123	72.6615	14.3638			11.2939	1.12939e+06
bac.014	SOG12-1 1c t0	10	1	500	10	510	Med	51.1	5651	11.2799	SOG12-1 1c t0			1b	11.2939	16.342	27.041	70.37	13.745			11.2799	1.12799e+06
bac.015	SOG12-1 2a t0	10	1	500	10	510	Med	51.1	5794	11.5653	SOG12-1 2a t0			1c	11.2799	16.0465	27.035	70.6036	14.27			11.5653	1.15653e+06
bac.016	SOG12-1 2b t0	10	1	500	10	510	Med	51.1	5820	11.6172	SOG12-1 2b t0			2a	11.5653	14.6872	20.4539	31.9474	30.1349			11.6172	1.16172e+06
bac.017	SOG12-1 2c t0	10	1	500	10	510	Med	51.1	5765	11.5074	SOG12-1 2c t0			2b	11.6172	14.2141	20.0906	33.6181	36.3368			11.5074	1.15074e+06
bac.028	SOG12-1 1a t1	10	1	500	10	510	Med	51.1	8187	16.342	SOG12-1 1a t1			2c	11.5074	14.5395	20.2703	32.2887	35.3427			16.342	1.6342e+06
bac.029	SOG12-1 1b t1	10	1	500	10	510	Med	51.1	8187	16.342	SOG12-1 1b t1											16.342	1.6342e+06
bac.030	SOG12-1 1c t1	10	1	500	10	510	Med	51.1	8039	16.0465	SOG12-1 1c t1				0	6.25	11	21	32			16.0465	1.60465e+06
bac.031	SOG12-1 2a t1	10	1	500	10	510	Med	51.1	7358	14.6872	SOG12-1 2a t1		ave	SW+Lys	11.2845	16.2435	27.1627	71.2117	14.1263			14.6872	1.46872e+06
bac.032	SOG12-1 2b t1	10	1	500	10	510	Med	51.1	7121	14.2141	SOG12-1 2b t1			SW	11.5633	14.4803	20.2716	32.618	33.9381			14.2141	1.42141e+06
bac.033	SOG12-1 2c t1	10	1	500	10	510	Med	51.1	7284	14.5395	SOG12-1 2c t1											14.5395	1.45395e+06
bac.044	SOG12-1 1a t2	10	1	500	10	510	Med	51.1	13733	27.4123	SOG12-1 1a t2		stdev	SW+Lys	0.00806709	0.170561	0.216103	1.261	0.33349			27.4123	2.74123e+06
bac.045	SOG12-1 1b t2	10	1	500	10	510	Med	51.1	13547	27.041	SOG12-1 1b t2			SW	0.0549196	0.242032	0.181647	0.882715	3.33097			27.041	2.7041e+06
bac.046	SOG12-1 1c t2	10	1	500	10	510	Med	51.1	13544	27.035	SOG12-1 1c t2											27.035	2.7035e+06
bac.047	SOG12-1 2a t2	10	1	500	10	510	Med	51.1	10247	20.4539	SOG12-1 2a t2											20.4539	2.04539e+06
bac.048	SOG12-1 2b t2	10	1	500	10	510	Med	51.1	10065	20.0906	SOG12-1 2b t2											20.0906	2.00906e+06
bac.049	SOG12-1 2c t2	10	1	500	10	510	Med	51.1	10155	20.2703	SOG12-1 2c t2											20.2703	2.02703e+06
bac.059	SOG12-1 1a t3	10	1	500	10	510	Med	51.1	36402	72.6615	SOG12-1 1a t3											72.6615	7.26615e+06
bac.060	SOG12-1 1b t3	10	1	500	10	510	Med	51.1	35254	70.37	SOG12-1 1b t3											70.37	7.037e+06
bac.061	SOG12-1 1c t3	10	1	500	10	510	Med	51.1	35371	70.6036	SOG12-1 1c t3											70.6036	7.06036e+06
bac.062	SOG12-1 2a t3	10	1	500	10	510	Med	51.1	16005	31.9474	SOG12-1 2a t3											31.9474	3.19474e+06
bac.063	SOG12-1 2b t3	10	1	500	10	510	Med	51.1	16842	33.6181	SOG12-1 2b t3											33.6181	3.36181e+06
bac.064	SOG12-1 2c t3	10	1	500	10	510	Med	51.1	16176	32.2887	SOG12-1 2c t3											32.2887	3.22887e+06
bac.079	SOG12-1 1a t4	10	1	500	10	510	Med	51.1	64322	128.392	SOG12-1 1a t4											14.3638	1.43638e+06
bac.080	SOG12-1 1a t4	10	1	500	10	510	Med	51.1	7196	14.3638	SOG12-1 1a t4											13.745	1.3745e+06
bac.081	SOG12-1 1b t4	10	1	500	10	510	Med	51.1	6886	13.745	SOG12-1 1b t4											14.27	1.427e+06
bac.082	SOG12-1 1c t4	10	1	500	10	510	Med	51.1	7149	14.27	SOG12-1 1c t4											30.1349	3.01349e+06
bac.083	SOG12-1 2a t4	10	1	500	10	510	Med	51.1	15097	30.1349	SOG12-1 2a t4											36.3368	3.63368e+06
bac.084	SOG12-1 2b t4	10	1	500	10	510	Med	51.1	18204	36.3368	SOG12-1 2b t4											35.3427	3.53427e+06
bac.085	SOG12-1 2c t4	10	1	500	10	510	Med	51.1	17706	35.3427	SOG12-1 2c t4

## Sheet: 1-Vir
File name	Sample ID	Dilution factor	Acquisition time (min)	Sample volume (µl)	SYBR Green (µl)	Total volume (µl)	Flow mode	Flow rate (µl min-1)	Blanks	HNA (events)	HNA (106 ml-1)
							Med	51.1
vir.001	TE 1						Med	51.1		225		TE 1
vir.002	TE 2						Med	51.1		237		TE 2					0	6.25	11	21	32
vir.003	TE 3						Med	51.1	218.5	200		TE 3				1a	80.3059	173.785	218.672	172.728	385.816
vir.004	TE 4						Med	51.1	219	212		TE 4				1b	62.1219	157.894	178.647	173.538	385.984
vir.005	SOG12-1 1a t0	500	1	500	5	505	Med	51.1	219	8345	80.3059	SOG12-1 1a t0				1c	56.4592	156.846	170.929	181.019	358.797
vir.006	SOG12-1 1b t0	500	1	500	5	505	Med	51.1	219	7148	68.4764	SOG12-1 1b t0				2a	18.4705	23.062	28.3116	28.6516	51.9409
vir.007	SOG12-1 2a t0	500	1	500	5	505	Med	51.1	219	2088	18.4705	SOG12-1 2a t0				2b	15.3575	9.56239	29.12	28.4697	52.4232
vir.008	SOG12-1 2b t0	500	1	500	5	505	Med	51.1	219	1773	15.3575	SOG12-1 2b t0				2c	13.8356	24.2538	28.9243	27.2819	51.9488
vir.009	SOG12-1 2c t0	500	1	500	5	505	Med	51.1	219	1619	13.8356	SOG12-1 2c t0
vir.010	SOG12-1 1b t0	500	1	500	5	505	Med	51.1	219	6505	62.1219	SOG12-1 1b t0					0	6.25	11	21	32
vir.011	SOG12-1 1c t0	500	1	500	5	505	Med	51.1	219	5932	56.4592	SOG12-1 1c t0			ave	SW+Lys	66.2957	162.842	189.416	175.762	376.866
vir.018	TE 1						Med	51.1		188		TE 1				SW	15.8879	18.9594	28.7853	28.1344	52.1043
vir.019	TE 2						Med	51.1		182		TE 2
vir.020	TE 3						Med	51.1	174.75	149		TE 3			stdev	SW+Lys	7.19331	5.48001	14.7966	2.63916	9.03446
vir.021	TE 4						Med	51.1	175	180		TE 4				SW	1.36402	4.71109	0.243495	0.429489	0.159455
vir.022	SOG12-1 1a t1	500	1	500	5	505	Med	51.1	175	17760	173.785	SOG12-1 1a t1
vir.023	SOG12-1 1b t1	500	1	500	5	505	Med	51.1	175	16152	157.894	SOG12-1 1b t1
vir.024	SOG12-1 1c t1	500	1	500	5	505	Med	51.1	175	16046	156.846	SOG12-1 1c t1
vir.025	SOG12-1 2a t1	100	1	500	5	505	Med	51.1	175	11843	23.062	SOG12-1 2a t1
vir.026	SOG12-1 2b t1	100	1	500	5	505	Med	51.1	175	5013	9.56239	SOG12-1 2b t1
vir.027	SOG12-1 2c t1	100	1	500	5	505	Med	51.1	175	12446	24.2538	SOG12-1 2c t1
vir.034	TE 1						Med	51.1		2439		TE 1
vir.035	TE 2						Med	51.1		774		TE 2
vir.036	TE 3						Med	51.1		670		TE 3
vir.037	TE 4						Med	51.1	443	443		TE 4
vir.038	SOG12-1 1a t2	500	1	500	5	505	Med	51.1	443	22570	218.672	SOG12-1 1a t2
vir.039	SOG12-1 1b t2	500	1	500	5	505	Med	51.1	443	18520	178.647	SOG12-1 1b t2
vir.040	SOG12-1 1c t2	500	1	500	5	505	Med	51.1	443	17739	170.929	SOG12-1 1c t2
vir.041	SOG12-1 2a t2	100	1	500	5	505	Med	51.1	443	14767	28.3116	SOG12-1 2a t2
vir.042	SOG12-1 2b t2	100	1	500	5	505	Med	51.1	443	15176	29.12	SOG12-1 2b t2
vir.043	SOG12-1 2c t2	100	1	500	5	505	Med	51.1	443	15077	28.9243	SOG12-1 2c t2
vir.050	TE 1						Med	51.1		329		TE 1
vir.051	TE 2						Med	51.1		231		TE 2
vir.052	TE 3						Med	51.1	211	211		TE 3
vir.053	SOG12-1 1a t3	500	1	500	5	505	Med	51.1	211	17689	172.728	SOG12-1 1a t3
vir.054	SOG12-1 1b t3	500	1	500	5	505	Med	51.1	211	17771	173.538	SOG12-1 1b t3
vir.055	SOG12-1 1c t3	500	1	500	5	505	Med	51.1	211	18528	181.019	SOG12-1 1c t3
vir.056	SOG12-1 2a t3	100	1	500	5	505	Med	51.1	211	14707	28.6516	SOG12-1 2a t3
vir.057	SOG12-1 2b t3	100	1	500	5	505	Med	51.1	211	14615	28.4697	SOG12-1 2b t3
vir.058	SOG12-1 2c t3	100	1	500	5	505	Med	51.1	211	14014	27.2819	SOG12-1 2c t3
vir.069	TE 1						Med	51.1		621		TE 1
vir.070	TE 2						Med	51.1		599		TE 2
vir.071	TE 3						Med	51.1		476		TE 3
vir.072	TE 4						Med	51.1	424	424		TE 4
vir.073	SOG12-1 1a t4	500	1	500	5	505	Med	51.1	424	39464	385.816	SOG12-1 1a t4
vir.074	SOG12-1 1b t4	500	1	500	5	505	Med	51.1	424	39481	385.984	SOG12-1 1b t4
vir.075	SOG12-1 1c t4	500	1	500	5	505	Med	51.1	424	36730	358.797	SOG12-1 1c t4
vir.076	SOG12-1 2a t4	100	1	500	5	505	Med	51.1	424	26703	51.9409	SOG12-1 2a t4
vir.077	SOG12-1 2b t4	100	1	500	5	505	Med	51.1	424	26947	52.4232	SOG12-1 2b t4
vir.078	SOG12-1 2c t4	100	1	500	5	505	Med	51.1	424	26707	51.9488	SOG12-1 2c t4

## Sheet: 1-PP
File name	Sample ID	Dilution factor	Acquisition time (min)	Flow mode	Flow rate (µl min-1)	R1 (cyanos)	R2 (to right of R1)	R3 (above R1)	R4 (top large cloud)	R1 (103/ml)	R2 (103/ml)	R3 (103/ml)	R4 (103/ml)	HNA (103/ml)
				High	70.4
pp.074	SOG12-12 2c t2	1	5	High	70.4	10747	1324	2110	282	30.5312	3.76136	5.99432	0.801136	41.0881	SOG12-12 2c t2
pp.075	SOG12-12 2c t2	1	10	High	70.4	3516	426	525	55	4.99432	0.605114	0.745739	0.078125	6.4233	SOG12-12 2c t2
pp.076	SOG12-1 1a t0	1	10	High	70.4	3206	691	94	295	4.55398	0.981534	0.133523	0.419034	6.08807	SOG12-1 1a t0				0	6.25	11	21	32
pp.077	SOG12-1 1a t0	1	5	High	70.4	736	165	24	49	2.09091	0.46875	0.0681818	0.139205	2.76705	SOG12-1 1a t0			1a	6.08807	3.10795	7.74148	5.95881	4.30114
pp.080	SOG12-1 2a t0	1	5	High	70.4	1697	243	56	179	4.82102	0.690341	0.159091	0.508523	6.17898	SOG12-1 2a t0			1b	6.18919	9.25375	5.39339	8.45646	10
pp.081	SOG12-1 2a t0	1	10	High	70.4	1869	521	54	195	2.65483	0.740057	0.0767045	0.276989	3.74858	SOG12-1 2a t0			1c	9.45646	9.43243	8.82883	3.85285	13.4835
pp.082	SOG12-1 1a t1	1	10	High	70.4	1690	227	83	188	2.40057	0.322443	0.117898	0.267045	3.10795	SOG12-1 1a t1			2a	3.74858	4.05856	7.95195	12.9339	5.31231
pp.086	SOG12-1 1a t2	1	10	High	70.4	4048	620	233	549	5.75	0.880682	0.330966	0.77983	7.74148	SOG12-1 1a t2			2b	7.44745	9.31081		7.46246	9.75375
pp.088	SOG12-1 1a t3	1	10	High	70.4	2919	674	127	475	4.14631	0.957386	0.180398	0.674716	5.95881	SOG12-1 1a t3			2c	8.54204	9.80631	5.66066	2.61562
pp.090	SOG12-1 1a t4	1	10	High	70.4	1999	662	46	321	2.83949	0.940341	0.0653409	0.455966	4.30114	SOG12-1 1a t4
																			0	6.25	11	21	32
pp.001	SOG12-1 1c t0	1	10	High	66.6	4648	870	235	545	6.97898	1.30631	0.352853	0.818318	9.45646	SOG12-1 1c t0			SW+Lys	7.24457	7.26471	7.32123	6.08937	9.26154
pp.002	SOG12-1 2c t0	1	10	High	66.6	4323	729	165	472	6.49099	1.09459	0.247748	0.708709	8.54204	SOG12-1 2c t0			SW	6.57936	7.72523	6.80631	7.67067	7.53303
pp.003	SOG12-1 1b t0	1	10	High	66.6	3055	515	160	392	4.58709	0.773273	0.24024	0.588589	6.18919	SOG12-1 1b t0
pp.004	SOG12-1 2b t0	1	10	High	66.6	3647	719	156	438	5.47598	1.07958	0.234234	0.657658	7.44745	SOG12-1 2b t0				1.91622	3.60097	1.75585	2.30458	4.6355
pp.005	SOG12-1 1b t1	1	10	High	66.6	4431	828	406	498	6.65315	1.24324	0.60961	0.747748	9.25375	SOG12-1 1b t1				2.51187	3.18508	1.62019	5.16231	3.14057
pp.006	SOG12-1 1c t1	1	10	High	66.6	4554	866	321	541	6.83784	1.3003	0.481982	0.812312	9.43243	SOG12-1 1c t1
pp.007	SOG12-1 2b t1	1	10	High	66.6	4537	808	373	483	6.81231	1.21321	0.56006	0.725225	9.31081	SOG12-1 2b t1
pp.008	SOG12-1 2c t1	1	10	High	66.6	4799	883	395	454	7.20571	1.32583	0.593093	0.681682	9.80631	SOG12-1 2c t1
pp.009	SOG12-1 2a t1	1	10	High	66.6	2024	359	144	176	3.03904	0.539039	0.216216	0.264264	4.05856	SOG12-1 2a t1
pp.010	SOG12-1 1c t2	1	10	High	66.6	4324	831	214	511	6.49249	1.24775	0.321321	0.767267	8.82883	SOG12-1 1c t2			Pre-dil	Post-dil
pp.011	SOG12-1 2a t2	1	10	High	66.6	3923	639	299	435	5.89039	0.959459	0.448949	0.653153	7.95195	SOG12-1 2a t2		1a	4.30114	7.84084
pp.012	SOG12-1 2c t2	1	10	High	66.6	2763	509	222	276	4.14865	0.764264	0.333333	0.414414	5.66066	SOG12-1 2c t2		1b	10	1.41892
pp.013	SOG12-1 1b t2	1	10	High	66.6	2576	499	170	347	3.86787	0.749249	0.255255	0.521021	5.39339	SOG12-1 1b t2		1c	13.4835	25.2462
pp.014	SOG12-1 2c t3	1	10	High	66.6	1157	335	64	186	1.73724	0.503003	0.0960961	0.279279	2.61562	SOG12-1 2c t3
pp.015	SOG12-1 1c t3	1	10	High	66.6	1770	413	175	208	2.65766	0.62012	0.262763	0.312312	3.85285	SOG12-1 1c t3
pp.016	SOG12-1 2b t3	1	10	High	66.6	3236	988	252	494	4.85886	1.48348	0.378378	0.741742	7.46246	SOG12-1 2b t3
pp.017	SOG12-1 1b t3	1	10	High	66.6	3790	998	312	532	5.69069	1.4985	0.468468	0.798799	8.45646	SOG12-1 1b t3
pp.018	SOG12-1 2a t3	1	10	High	66.6	6353	844	910	507	9.53904	1.26727	1.36637	0.761261	12.9339	SOG12-1 2a t3
pp.019	SOG12-1 1b t4	1	10	High	66.6	3747	1941	264	708	5.62613	2.91441	0.396396	1.06306	10	SOG12-1 1b t4
pp.020	SOG12-1 2b t4	1	10	High	66.6	3017	2212	189	1078	4.53003	3.32132	0.283784	1.61862	9.75375	SOG12-1 2b t4
pp.021	SOG12-1 1c t4	1	10	High	66.6	5456	2283	251	990	8.19219	3.42793	0.376877	1.48649	13.4835	SOG12-1 1c t4
pp.022	SOG12-1 2a t4	1	10	High	66.6	1720	1194	111	513	2.58258	1.79279	0.166667	0.77027	5.31231	SOG12-1 2a t4
pp.023	SOG12-1 1a post dil	1	10	High	66.6	3063	532	300	1327	4.5991	0.798799	0.45045	1.99249	7.84084	SOG12-1 1a post dil
pp.024	SOG12-1 1b post dil	1	10	High	66.6	484	116	70	275	0.726727	0.174174	0.105105	0.412913	1.41892	SOG12-1 1b post dil
pp.025	SOG12-1 1c post dil	1	10	High	66.6	7103	1791	864	7056	10.6652	2.68919	1.2973	10.5946	25.2462	SOG12-1 1c post dil

## Sheet: 2-NH4
Ammonium Station 2
	sens. 30
0	21.9	22.2	21.6	21.9								slope	478.34
0.05	43.6	47.7		45.65								y-int	24.474
0.1	74.7	75.3		75
0.25	143.6	144.8		144.2
0.5	261.1	276.8		268.95
1	500	851.4		500
			a	b	c	a	b	c	average	stdev				0	3.5	13.5	19.75	27
	1	t0	207.4	195.3	190	0.382418	0.357123	0.346043	0.361861	0.0186451			SW+Lys	0.361861	0.222002	0.136289	0.0359424	0.255661
	2	t0	71.1	57.6	48.4	0.0974746	0.069252	0.0500188	0.0722485	0.0238694			SW	0.0722485	0.0224234	0.0131552	0.0146883	0.0131552
	1	t1	134.6	128.6	128.8	0.230225	0.217682	0.2181	0.222002	0.00712429
	2	t1	32.9	34.5	38.2	0.0176151	0.02096	0.0286951	0.0224234	0.0056831				0.0186451	0.00712429	0.0145356	0.0097258	0.0181727
	1	t2	82.6	89.9	96.5	0.121516	0.136777	0.150575	0.136289	0.0145356				0.0238694	0.0056831	0.00258024	0.00806697	0.0101222
	2	t2	29.4	31.8	31.1	0.0102981	0.0153155	0.0138521	0.0131552	0.00258024
	1	t3	46.4	37.1	41.5	0.0458377	0.0263955	0.0355939	0.0359424	0.0097258
	2	t3	35.2	27.5	31.8	0.0224234	0.00632604	0.0153155	0.0146883	0.00806697
	1	t4	156.8	141.5	142	0.276636	0.24465	0.245696	0.255661	0.0181727
	2	t4	34	25.2	33.1	0.0199147	0.00151775	0.0180332	0.0131552	0.0101222
					For R:	0.382418
						0.357123
						0.346043
						0.0974746
						0.069252
						0.0500188
						0.230225
						0.217682
						0.2181
						0.0176151		t0 to t4
						0.02096		Drawdown	A	B	C	Ave	StDev
						0.0286951		SW+Lys	0.105782	0.112472	0.100347	0.106201	0.00607344
						0.121516		SW	0.0775599	0.0677342	0.0319856	0.0590933	0.0239844
						0.136777		t0 to t3
						0.150575		Drawdown	A	B	C	Ave	StDev
						0.0102981		SW+Lys	0.336581	0.330727	0.310449	0.325919	0.0137135
						0.0153155		SW	0.0750512	0.062926	0.0347033	0.0575602	0.0207022
						0.0138521
						0.0458377					0.0299953
						0.0263955					4.79616e-05
						0.0355939
						0.0224234
						0.00632604
						0.0153155
						0.276636
						0.24465
						0.245696
						0.0199147
						0.00151775
						0.0180332

## Sheet: 2-Bac
File name	Sample ID	Dilution factor	Acquisition time (min)	Sample volume (µl)	SYBR Green (µl)	Total volume (µl)	Flow mode	Flow rate (µl min-1)	HNA (events)	HNA (105 ml-1)
							Med	49.6
bac.017	SOG12-2 1a t0	50	1	500	10	510	Med	49.6	666	6.84798	SOG12-2 1a t0
bac.018	SOG12-2 1b t0	50	1	500	10	510	Med	49.6	760	7.81452	SOG12-2 1b t0				0	3.5	13.5	19.75	27			For R:	6.84798	684798
bac.019	SOG12-2 1c t0	50	1	500	10	510	Med	49.6	1056	10.8581	SOG12-2 1c t0			1a	6.84798	13.4389	18.796	42.3711	95.3762		88.5282		7.81452	781452
bac.020	SOG12-2 2a t0	50	1	500	10	510	Med	49.6	1069	10.9917	SOG12-2 2a t0			1b	7.81452	14.0661	18.8721	42.8914	90.9425		83.1279		10.8581	1.08581e+06
bac.021	SOG12-2 2b t0	50	1	500	10	510	Med	49.6	1130	11.619	SOG12-2 2b t0			1c	10.8581	12.75	18.5451	42.4287	90.3975		79.5394		10.9917	1.09917e+06
bac.022	SOG12-2 2c t0	50	1	500	10	510	Med	49.6	1073	11.0329	SOG12-2 2c t0			2a	10.9917	13.2435	17.011	21.6483	23.1289		12.1372		11.619	1.1619e+06
bac.023	SOG12-2 1a t1	50	1	500	10	510	Med	49.6	1307	13.4389	SOG12-2 1a t1			2b	11.619	13.696	17.3153	22.2056	24.7144		13.0955		11.0329	1.10329e+06
bac.024	SOG12-2 1b t1	50	1	500	10	510	Med	49.6	1368	14.0661	SOG12-2 1b t1			2c	11.0329	13.6651	17.0069	21.8683	22.8246		11.7917		13.4389	1.34389e+06
bac.025	SOG12-2 1c t1	50	1	500	10	510	Med	49.6	1240	12.75	SOG12-2 1c t1										0.00108051		14.0661	1.40661e+06
bac.026	SOG12-2 2a t1	50	1	500	10	510	Med	49.6	1288	13.2435	SOG12-2 2a t1				0	3.5	13.5	19.75	27				12.75	1275000
bac.027	SOG12-2 2b t1	50	1	500	10	510	Med	49.6	1332	13.696	SOG12-2 2b t1		ave	SW+Lys	8.50685	13.4183	18.7377	42.5638	92.2387				13.2435	1.32435e+06
bac.028	SOG12-2 2c t1	50	1	500	10	510	Med	49.6	1329	13.6651	SOG12-2 2c t1			SW	11.2145	13.5349	17.111	21.9074	23.556				13.696	1.3696e+06
bac.045	SOG12-2 1a t2	10	1	500	10	510	Med	49.6	9140	18.796	SOG12-2 1a t2												13.6651	1.36651e+06
bac.046	SOG12-2 1b t2	10	1	500	10	510	Med	49.6	9177	18.8721	SOG12-2 1b t2		stdev	SW+Lys	2.09277	0.658305	0.171098	0.28522	2.73075				18.796	1.8796e+06
bac.047	SOG12-2 1c t2	10	1	500	10	510	Med	49.6	9018	18.5451	SOG12-2 1c t2			SW	0.350855	0.252771	0.176919	0.280696	1.01474		2.14911e-06		18.8721	1.88721e+06
bac.048	SOG12-2 2a t2	10	1	500	10	510	Med	49.6	8272	17.011	SOG12-2 2a t2												18.5451	1.85451e+06
bac.049	SOG12-2 2b t2	10	1	500	10	510	Med	49.6	8420	17.3153	SOG12-2 2b t2												17.011	1.7011e+06
bac.050	SOG12-2 2c t2	10	1	500	10	510	Med	49.6	8270	17.0069	SOG12-2 2c t2												17.3153	1.73153e+06
bac.051	SOG12-2 1a t3	10	1	500	10	510	Med	49.6	20604	42.3711	SOG12-2 1a t3												17.0069	1.70069e+06
bac.052	SOG12-2 1b t3	10	1	500	10	510	Med	49.6	20857	42.8914	SOG12-2 1b t3												42.3711	4.23711e+06
bac.053	SOG12-2 1c t3	10	1	500	10	510	Med	49.6	20632	42.4287	SOG12-2 1c t3												42.8914	4.28914e+06
bac.054	SOG12-2 2a t3	10	1	500	10	510	Med	49.6	10527	21.6483	SOG12-2 2a t3												42.4287	4.24287e+06
bac.055	SOG12-2 2b t3	10	1	500	10	510	Med	49.6	10798	22.2056	SOG12-2 2b t3												21.6483	2.16483e+06
bac.056	SOG12-2 2c t3	10	1	500	10	510	Med	49.6	10634	21.8683	SOG12-2 2c t3												22.2056	2.22056e+06
bac.067	SOG12-2 1a t4	10	1	500	10	510	Med	49.6	46379	95.3762	SOG12-2 1a t4												21.8683	2.18683e+06
bac.068	SOG12-2 1b t4	10	1	500	10	510	Med	49.6	44223	90.9425	SOG12-2 1b t4												95.3762	9.53762e+06
bac.069	SOG12-2 1c t4	10	1	500	10	510	Med	49.6	43958	90.3975	SOG12-2 1c t4												90.9425	9.09425e+06
bac.070	SOG12-2 2a t4	10	1	500	10	510	Med	49.6	11247	23.1289	SOG12-2 2a t4												90.3975	9039750
bac.071	SOG12-2 2b t4	10	1	500	10	510	Med	49.6	12018	24.7144	SOG12-2 2b t4												23.1289	2.31289e+06
bac.072	SOG12-2 2c t4	10	1	500	10	510	Med	49.6	11099	22.8246	SOG12-2 2c t4												24.7144	2.47144e+06
																							22.8246	2.28246e+06

## Sheet: 2-Vir
File name	Sample ID	Dilution factor	Acquisition time (min)	Sample volume (µl)	SYBR Green (µl)	Total volume (µl)	Flow mode	Flow rate (µl min-1)	Blanks	HNA (events)	HNA (105 ml-1)
							Med	49.6
vir.001	TE 1						Med	49.6		1310		TE 1
vir.002	TE 2						Med	49.6		1196		TE 2				0	3.5	13.5	19.75	27
vir.003	TE 2						Med	49.6		1258		TE 2			1a	364.781	441.427	575.232	394.063	447.801
vir.004	TE 3						Med	49.6	912	912		TE 3			1b	359.018	350.507	418.03	458.98	413.937
vir.005	SOG12-2 1a t0	1000	1	500	5	505	Med	49.6	912	18826	364.781	SOG12-2 1a t0			1c	371.867	346.292	462.034	434.667	442.588
vir.006	SOG12-2 1b t0	1000	1	500	5	505	Med	49.6	912	18543	359.018	SOG12-2 1b t0			2a	18.2431	47.6309	49.2436	45.4602	47.7734
vir.007	SOG12-2 1c t0	1000	1	500	5	505	Med	49.6	912	19174	371.867	SOG12-2 1c t0			2b	52.0048	48.9117	48.6124	46.2951	47.8223
vir.008	SOG12-2 2a t0	100	1	500	5	505	Med	49.6	912	9871	18.2431	SOG12-2 2a t0			2c	52.8702	49.4472	48.9402	49.0094	47.8711
vir.009	SOG12-2 2b t0	100	1	500	5	505	Med	49.6	912	26451	52.0048	SOG12-2 2b t0
vir.010	SOG12-2 2c t0	100	1	500	5	505	Med	49.6	912	26876	52.8702	SOG12-2 2c t0				0	3.5	13.5	19.75	27
vir.011	SOG12-2 1a t1	1000	1	500	5	505	Med	49.6	912	27798	547.477	SOG12-2 1a t1		ave	SW+Lys	365.222	379.408	485.099	429.236	434.775
vir.012	SOG12-2 1b t1	1000	1	500	5	505	Med	49.6	912	18125	350.507	SOG12-2 1b t1			SW	41.0394	48.6633	48.9321	46.9216	47.8223
vir.013	SOG12-2 1c t1	1000	1	500	5	505	Med	49.6	912	17918	346.292	SOG12-2 1c t1
vir.014	SOG12-2 2a t1	100	1	500	5	505	Med	49.6	912	24303	47.6309	SOG12-2 2a t1		stdev	SW+Lys	6.43585	53.751	81.0991	32.7974	18.2335
vir.015	SOG12-2 2b t1	100	1	500	5	505	Med	49.6	912	24932	48.9117	SOG12-2 2b t1			SW	19.7469	0.933321	0.315704	1.85571	0.048871
vir.016	SOG12-2 2c t1	100	1	500	5	505	Med	49.6	912	25195	49.4472	SOG12-2 2c t1
vir.029	TE 1						Med	49.6		882		TE 1
vir.030	TE 2						Med	49.6		957		TE 2
vir.031	TE 3						Med	49.6		501		TE 3
vir.032	TE 4						Med	49.6	487	487		TE 4
vir.033	SOG12-2 1a t2	1000	1	500	5	505	Med	49.6	487	28736	575.232	SOG12-2 1a t2
vir.034	SOG12-2 1b t2	1000	1	500	5	505	Med	49.6	487	21016	418.03	SOG12-2 1b t2
vir.035	SOG12-2 1c t2	1000	1	500	5	505	Med	49.6	487	23177	462.034	SOG12-2 1c t2
vir.036	SOG12-2 2a t2	100	1	500	5	505	Med	49.6	487	24670	49.2436	SOG12-2 2a t2
vir.037	SOG12-2 2b t2	100	1	500	5	505	Med	49.6	487	24360	48.6124	SOG12-2 2b t2
vir.038	SOG12-2 2c t2	100	1	500	5	505	Med	49.6	487	24521	48.9402	SOG12-2 2c t2
vir.039	SOG12-2 1a t3	1000	1	500	5	505	Med	49.6	487	19839	394.063	SOG12-2 1a t3
vir.040	SOG12-2 1b t3	1000	1	500	5	505	Med	49.6	487	23027	458.98	SOG12-2 1b t3
vir.041	SOG12-2 1c t3	1000	1	500	5	505	Med	49.6	487	21833	434.667	SOG12-2 1c t3
vir.042	SOG12-2 2a t3	100	1	500	5	505	Med	49.6	487	22812	45.4602	SOG12-2 2a t3
vir.043	SOG12-2 2b t3	100	1	500	5	505	Med	49.6	487	23222	46.2951	SOG12-2 2b t3
vir.044	SOG12-2 2c t3	100	1	500	5	505	Med	49.6	487	24555	49.0094	SOG12-2 2c t3
vir.057	TE 1						Med	49.6		2064		TE 1
vir.058	TE 2						Med	49.6		2079		TE 2
vir.059	TE 3						Med	49.6		1393		TE 3
vir.060	TE 4						Med	49.6	736	736		TE 4
vir.061	SOG12-2 1a t4	1000	1	500	5	505	Med	49.6	736	22727	447.801	SOG12-2 1a t4
vir.062	SOG12-2 1b t4	1000	1	500	5	505	Med	49.6	736	21064	413.937	SOG12-2 1b t4
vir.063	SOG12-2 1c t4	1000	1	500	5	505	Med	49.6	736	22471	442.588	SOG12-2 1c t4
vir.064	SOG12-2 2a t4	100	1	500	5	505	Med	49.6	736	24197	47.7734	SOG12-2 2a t4
vir.065	SOG12-2 2b t4	100	1	500	5	505	Med	49.6	736	24221	47.8223	SOG12-2 2b t4
vir.066	SOG12-2 2c t4	100	1	500	5	505	Med	49.6	736	24245	47.8711	SOG12-2 2c t4
vir.011	SOG12-2 1a t1	1000	1	500	5	505	Med	49.6	736	22414	441.427	SOG12-2 1a t1

## Sheet: All-Chla
							ug/L Chla	Phaeopigments																			Separating the replicates
33	1	1at0	50	21.2	10.1	10	4.8461	4.40951
34	1	1bt0	50	26.6	12.9	10	5.98122	5.63195							Stn 1	Initial	Final										Stn 1	T=0	T=end								t test between treatments
35	1	1ct0	50	26.8	12.9	10	6.06854	5.63195								0	32										SW+Lys A	4.8461	5.37								T=0	T=end
36	1	2at0	50	16.7	8.18	10	3.71971	3.57127						ave	SW+L	5.63195	6.02488										SW+Lys B	5.98122	7.9022							Stn 1	0.0567594	0.042614	diff beg and end
37	1	2bt0	50	22	10.8	10	4.88976	4.71512							SW	3.92345	3.19581										SW+Lys C	6.06854	4.80244							Stn 2	0.0195527	0.742434	diff at beg, but not end
38	1	2ct0	50	14.4	7.16	10	3.16088	3.12595						stdev		0.393735	0.952851										SW A	3.71971	2.90329
39	1	1at4	50	23.9	11.6	10	5.37	5.06439								0.509375	0.146262										SW B	4.88976	3.34425
40	1	1bt4	50	35.2	17.1	10	7.9022	7.46561																			SW C	3.16088	3.33988								t test between times
41	1	1ct4	50	21.5	10.5	10	4.80244	4.58415							Stn 2	Initial	Final																				SW+Lys	SW
42	1	2at4	50	13.3	6.65	10	2.90329	2.90329								0	27										Stn 2	T=0	T=end							Stn 1	0.722496	0.241687	no diff
43	1	2bt4	50	14.9	7.24	10	3.34425	3.16088						ave	SW+L	2.88292	3.13032										SW+Lys A	2.86837	4.14756							Stn 2	0.681602	0.102281	no diff
44	1	2ct4	50	15.2	7.55	10	3.33988	3.29622							SW	4.29309	2.84799										SW+Lys B	3.27439	2.75486
45	2	1at0	50	13.4	6.83	10	2.86837	2.98188						stdev		0.221935	0.5144										SW+Lys C	2.506	2.48854
46	2	1bt0	50	15.7	8.2	10	3.27439	3.58								0.30072	0.614673										SW A	3.71098	2.97751
47	2	1ct0	50	11.8	6.06	10	2.506	2.64571																			SW B	4.45317	1.72451
48	2	2at0	50	17.6	9.1	10	3.71098	3.97293																			SW C	4.71512	3.84195
49	2	2bt0	50	21.1	10.9	10	4.45317	4.75878
50	2	2ct0	50	21.4	10.6	10	4.71512	4.62781
51	2	1at4	50	21.1	11.6	10	4.14756	5.06439
52	2	1bt4	50	13.6	7.29	10	2.75486	3.18271
53	2	1ct4	50	12.6	6.9	10	2.48854	3.01244
54	2	2at4	50	15.1	8.28	10	2.97751	3.61493
55	2	2bt4	50	9.4	5.45	10	1.72451	2.37939
56	2	2ct4	50	20.2	11.4	10	3.84195	4.97708
69	blank filter			0.018	0.091	10
70	blank filter			0.03	0.03	10																					t tests	T=0
71	blank acetone			0	0	10																					Stn 1	0.0567594
72	CHNJ SW (118um) 2Aug12		43	1.96	1.21	10	0.380743																				Stn 2	0.0195527

## Sheet: 1-PP-New
File name	Sample ID	Dilution factor	Acquisition time (min)	Flow mode	Flow rate (µl min-1)	R1 (cyanos)	R2 (to right of R1)	R3 (above R1)	R4 (top large cloud)	R1 (103/ml)	R2 (103/ml)	R3 (103/ml)	R4 (103/ml)	HNA (103/ml)
				High	66.6
pp.004	SOG12-1 2b t0	1	10	High	66.6	3937	281	478	637	0.591141	0.0421922	0.0717718	0.0956456	0.800751	SOG12-1 2b t0
pp.005	SOG12-1 1b t1	1	10	High	66.6	4607	689	528	733	0.691742	0.103453	0.0792793	0.11006	0.984535	SOG12-1 1b t1				t0	t1	t2	t3	t4		R1	R2	R3	R4				For R:	0.365341	3653.41
pp.006	SOG12-1 1c t1	1	10	High	66.6	4865	485	570	756	0.73048	0.0728228	0.0855856	0.113514	1.0024	SOG12-1 1c t1			1a	0.365341	0.359801	0.950901	0.706907	0.495796	SL1	-0.090085	0.0205825	-0.0309011	-0.0300514					0.625676	6256.76
pp.007	SOG12-1 2b t1	1	10	High	66.6	4789	553	528	711	0.719069	0.083033	0.0792793	0.106757	0.988138	SOG12-1 2b t1			1b	0.625676	0.984535	0.570721	0.9003	1.05751	SL2	0.162312	0.03003	0.0545045	0.184985					0.972973	9729.73
pp.008	SOG12-1 2c t1	1	10	High	66.6	5118	588	474	793	0.768468	0.0882883	0.0711712	0.119069	1.047	SOG12-1 2c t1			1c	0.972973	1.0024	0.943844	0.400601	1.42928	SL3	0.206607	0.0144144	0.0591592	0.176126					0.467614	4676.14
pp.009	SOG12-1 2a t1	1	10	High	66.6	2192	227	191	303	0.329129	0.0340841	0.0286787	0.0454955	0.437387	SOG12-1 2a t1			2a	0.467614	0.437387	0.836336	1.35826	0.552402	S1	-0.0049797	-0.00981948	0.0399088	0.0596791					0.698048	6980.48
pp.010	SOG12-1 1c t2	1	10	High	66.6	4572	353	561	800	0.686486	0.053003	0.0842342	0.12012	0.943844	SOG12-1 1c t2			2b	0.698048	0.988138		0.803453	1.04985	S2	0.284234	0.0304805	0.0978979	-0.0608108					0.852102	8521.02
pp.011	SOG12-1 2a t2	1	10	High	66.6	4090	443	470	567	0.614114	0.0665165	0.0705706	0.0851351	0.836336	SOG12-1 2a t2			2c	0.852102	1.047	0.595796	0.28033											0.359801	3598.01
pp.012	SOG12-1 2c t2	1	10	High	66.6	2897	329	295	447	0.434985	0.0493994	0.0442943	0.0671171	0.595796	SOG12-1 2c t2																		0.984535	9845.35
pp.013	SOG12-1 1b t2	1	10	High	66.6	2695	272	373	461	0.404655	0.0408408	0.056006	0.0692192	0.570721	SOG12-1 1b t2				0	6.25	11	21	32		R1	R2	R3	R4					1.0024	10024
pp.014	SOG12-1 2c t3	1	10	High	66.6	1224	112	214	317	0.183784	0.0168168	0.0321321	0.0475976	0.28033	SOG12-1 2c t3			SW+L	0.654663	0.782246	0.821822	0.669269	0.994194	SW+L	0.0929446	0.0216757	0.0275875	0.110353					0.437387	4373.87
pp.015	SOG12-1 1c t3	1	10	High	66.6	1820	269	226	353	0.273273	0.0403904	0.0339339	0.053003	0.400601	SOG12-1 1c t3			SW	0.672588	0.824174	0.716066	0.814014	0.801126	SW	0.139627	0.0103305	0.0689033	-0.000565836					0.988138	9881.38
pp.016	SOG12-1 2b t3	1	10	High	66.6	3433	403	593	922	0.515465	0.0605105	0.089039	0.138438	0.803453	SOG12-1 2b t3																		1.047	10470
pp.017	SOG12-1 1b t3	1	10	High	66.6	3920	498	610	968	0.588589	0.0747748	0.0915916	0.145345	0.9003	SOG12-1 1b t3				0.176006	0.211285	0.125567	0.145473	0.271327		0.160048	0.00786499	0.0507061	0.121675					0.950901	9509.01
pp.018	SOG12-1 2a t3	1	10	High	66.6	6384	1303	559	800	0.958559	0.195646	0.0839339	0.12012	1.35826	SOG12-1 2a t3				0.11172	0.194138	0.0982003	0.311216	0.203082		0.204505	0.0284964	0.0410045	0.0851993					0.570721	5707.21
pp.019	SOG12-1 1b t4	1	10	High	66.6	4155	391	761	1736	0.623874	0.0587087	0.114264	0.260661	1.05751	SOG12-1 1b t4																		0.943844	9438.44
pp.020	SOG12-1 2b t4	1	10	High	66.6	3522	325	1032	2113	0.528829	0.0487988	0.154955	0.317267	1.04985	SOG12-1 2b t4																		0.836336	8363.36
pp.021	SOG12-1 1c t4	1	10	High	66.6	6072	415	964	2068	0.911712	0.0623123	0.144745	0.310511	1.42928	SOG12-1 1c t4																		0	0
pp.022	SOG12-1 2a t4	1	10	High	66.6	1997	173	490	1019	0.29985	0.025976	0.0735736	0.153003	0.552402	SOG12-1 2a t4																		0.595796	5957.96
pp.023	SOG12-1 1a post dil	1	10	High	66.6	3082	419	1370	450	0.462763	0.0629129	0.205706	0.0675676	0.798949	SOG12-1 1a post dil																		0.706907	7069.07
pp.024	SOG12-1 1b post dil	1	10	High	66.6	500	103	279	89	0.0750751	0.0154655	0.0418919	0.0133634	0.145796	SOG12-1 1b post dil																		0.9003	9003
pp.025	SOG12-1 1c post dil	1	10	High	66.6	7451	1271	7163	1494	1.11877	0.190841	1.07553	0.224324	2.60946	SOG12-1 1c post dil																		0.400601	4006.01
pp.001	SOG12-1 1c t0	1	10	High	66.6	4696	319	570	895	0.705105	0.0478979	0.0855856	0.134384	0.972973	SOG12-1 1c t0																		1.35826	13582.6
pp.002	SOG12-1 2c t0	1	10	High	66.6	4231	194	491	759	0.635285	0.0291291	0.0737237	0.113964	0.852102	SOG12-1 2c t0																		0.803453	8034.53
pp.003	SOG12-1 1b t0	1	10	High	66.6	3074	191	398	504	0.461562	0.0286787	0.0597598	0.0756757	0.625676	SOG12-1 1b t0																		0.28033	2803.3
pp.004	SOG12-1 2b t0	1	10	High	66.6	1629	122	380	2518	0.244595	0.0183183	0.0570571	0.378078	0.698048	SOG12-1 2b t0																		0.495796	4957.96
										#DIV/0!	#DIV/0!	#DIV/0!	#DIV/0!																				1.05751	10575.1
										#DIV/0!	#DIV/0!	#DIV/0!	#DIV/0!																				1.42928	14292.8
										#DIV/0!	#DIV/0!	#DIV/0!	#DIV/0!																				0.552402	5524.02
pp.078	SOG12-1 1a t0	1	1	High	70.4	99	8	2	21	0.140625	0.0113636	0.00284091	0.0298295	0.184659	SOG12-1 1a t0		C																1.04985	10498.5
pp.079	SOG12-1 2a t0	1	1	High	70.4	366	46	7	47	0.519886	0.0653409	0.00994318	0.0667614	0.661932	SOG12-1 2a t0		C																0	0
										#DIV/0!	#DIV/0!	#DIV/0!	#DIV/0!
										#DIV/0!	#DIV/0!	#DIV/0!	#DIV/0!
										#DIV/0!	#DIV/0!	#DIV/0!	#DIV/0!
pp.083	SOG12-1 1a t1	1	1	High	70.4	46	2	2	6	0.0653409	0.00284091	0.00284091	0.00852273	0.0795455	SOG12-1 1a t1		C			Pre-dil	Post-dil	Fold decrease
pp.084	SOG12-1 1a t1	1	5	High	70.4	67	9	3	5	0.0190341	0.00255682	0.000852273	0.00142045	0.0238636	SOG12-1 1a t1		C		1a		0.798949
pp.085	SOG12-1 1a t2	1	1	High	70.4	289	38	13	34	0.410511	0.0539773	0.0184659	0.0482955	0.53125	SOG12-1 1a t2		C		1b	1.05751	0.145796	7.25335
										#DIV/0!	#DIV/0!	#DIV/0!	#DIV/0!						1c	1.42928	2.60946	0.54773
pp.087	SOG12-1 1a t3	1	1	High	70.4	424	48	18	123	0.602273	0.0681818	0.0255682	0.174716	0.870739	SOG12-1 1a t3		C
										#DIV/0!	#DIV/0!	#DIV/0!	#DIV/0!
pp.089	SOG12-1 1a t4	1	1	High	70.4	554	24	66	214	0.786932	0.0340909	0.09375	0.303977	1.21875	SOG12-1 1a t4		C
										#DIV/0!	#DIV/0!	#DIV/0!	#DIV/0!
pp.076	SOG12-1 1a t0	1	10	High	70.4	4249	908	413	1831	0.603551	0.128977	0.0586648	0.260085	1.05128	SOG12-1 1a t0		P
pp.077	SOG12-1 1a t0	1	5	High	70.4	750	166	63	307	0.213068	0.0471591	0.0178977	0.0872159	0.365341	SOG12-1 1a t0		P
										#DIV/0!	#DIV/0!	#DIV/0!	#DIV/0!
										#DIV/0!	#DIV/0!	#DIV/0!	#DIV/0!
pp.080	SOG12-1 2a t0	1	5	High	70.4	1820	241	215	340	0.517045	0.0684659	0.0610795	0.0965909	0.743182	SOG12-1 2a t0		P
pp.081	SOG12-1 2a t0	1	10	High	70.4	2146	252	237	657	0.30483	0.0357955	0.0336648	0.0933239	0.467614	SOG12-1 2a t0		P
pp.082	SOG12-1 1a t1	1	10	High	70.4	1683	386	230	234	0.239063	0.0548295	0.0326705	0.0332386	0.359801	SOG12-1 1a t1		P
										#DIV/0!	#DIV/0!	#DIV/0!	#DIV/0!
										#DIV/0!	#DIV/0!	#DIV/0!	#DIV/0!
										#DIV/0!	#DIV/0!	#DIV/0!	#DIV/0!
pp.086	SOG12-1 1a t2	1	10	High	66.6	4206	786	686	655	0.631532	0.118018	0.103003	0.0983483	0.950901	SOG12-1 1a t2		P
										#DIV/0!	#DIV/0!	#DIV/0!	#DIV/0!
pp.088	SOG12-1 1a t3	1	10	High	66.6	2945	549	512	702	0.442192	0.0824324	0.0768769	0.105405	0.706907	SOG12-1 1a t3		P
										#DIV/0!	#DIV/0!	#DIV/0!	#DIV/0!
pp.090	SOG12-1 1a t4	1	10	High	66.6	2019	177	325	781	0.303153	0.0265766	0.0487988	0.117267	0.495796	SOG12-1 1a t4		P

[truncated: 2 more sheets: 2-PP-New, Lysate]
