# Supplementary material for: Virus-mediated transfer of nitrogen from heterotrophic bacteria to phytoplankton
Source: Copernicus journal article supplement (doi:10.5194/bg-15-809-2018), 2018-02-09
Supplement: Supplementary file 4 [file Shelford and Suttle 2018-SI and FRP N-15 Data.xlsx]

## Sheet: Sheet1
BOSTON UNIVERSITY STABLE ISOTOPE LABORATORY
DATA SHEET
Date: 3 September 2013							Samples Arrived: 3/28/13
Client: Emma Shelford							Job Number: 13N 15
Project: University of British Columbia							Comments:
Data emailed: 9/3/13							File name: sh13N15.xls
Samples Returned/Archived: consumed									Expected 15N values:
Data Location: Con 473													glycine	10.73
													peptone	7.4
IMPORTANT DISCLAIMER: Due to a quirk in Excel, numbers are shown to 9 decimal places.
Values MUST be rounded to 2 decimal places. The accuracy of the data are reliable to 2 decimal places ONLY.
Tray	Sample	Wt	N Ht.	[N]	d15N	Atom %	Comments	R		Experiment	Treatment	Vol filt. (ml)	[N] (umol)	[N] (umol/ml)	[15N] taken up (umol/ml)	15N uptake (umol/L)
Location		(mg)	nA	(umoles)	(air)
																		What number do I want? I want total N-15 taken up into particulate, per L
Tray 408C- 1	glycine	0.362	40.7545	4.63075	10.6461	0.370189		0.00371564										[15N]/L in particulate fraction (filter contents)
Tray 408C- 2	glycine	0.242	26.6911	3.03318	10.7709	0.370234		0.0037161
Tray 511C- 1	filter H	1	7.18791	0.817666	65.887	0.390344		0.00391873		SOG12-1	2b whole	100	0.817666	0.00817666	1.65768e-06	0.00165768
Tray 511C- 2	filter AN	1	0.654358	0.0754695	232.719	0.451164		0.00453209		GFF blank
Tray 511C- 3	filter AL	1	11.2319	1.27705	13715.7	5.13256		0.0541024		CHNR	Lys	10	1.27705	0.127705	0.00643461	6.43461
Tray 511C- 5	filter AG	1	15.7561	1.79099	30535.3	10.3894		0.11594		CHNR	3c	50	1.79099	0.0358197	0.00401982	4.01982
Tray 511C- 6	filter AD	1	18.5128	2.10414	28278.5	9.71816		0.107642		CHNR	1c	50	2.10414	0.0420829	0.00437352	4.37352			c	c	b	c
Tray 511C- 7	filter U	1	6.14591	0.699296	116123	30.0994		0.430602		SOG12-12	1b whole	75	0.699296	0.00932395	0.00398026	3.98026			SOG12-1	SOG12-2	SOG12-12	SOG12-12
Tray 511C- 8	filter V	1	6.87158	0.781731	83350.8	23.6709		0.310116		SOG12-12	1b filt	150	0.781731	0.00521154	0.00159681	1.59681		2 whole	0.00650305	0.00510538	0.00256244	0.00425028	2 whole = control (no N-15 added)
Tray 511C- 9	glycine	0.327	40.1782	4.56528	35.4491	0.379239	carryover from highly enriched samples											1 whole	3.61594	3.70853	3.98026	4.3409	1 whole = PP and bacteria taking up N-15
Tray 511C-10	filter Z	1	9.06433	1.03082	78.3577	0.394893		0.00396458		SOG12-12	2b whole	100	1.03082	0.0103082	2.56244e-06	0.00256244		1 filt	1.67499	1.31517	1.59681	1.76734	1 filt = PP only taking up N-15
Tray 511C-11	filter W	1	5.94341	0.676293	130950	32.6652		0.485116		SOG12-12	1c whole	75	0.676293	0.00901724	0.0043409	4.3409		Fold decrease	1	1.34278	4.38146	10.1302
Tray 511C-12	Xilter	1	7.36428	0.837701	86087.8	24.2527		0.320178		SOG12-12	1c filt	150	0.837701	0.00558467	0.00176734	1.76734		Expected	1.67499	1.76598	6.99638	17.9035
Tray 511D- 1	filter AA	1	8.36833	0.951759	132.21	0.414532		0.00416257		SOG12-12	2c whole	100	0.951759	0.00951759	4.25028e-06	0.00425028		Proportion	0.463224	0.476195	1	1	Proportion of 1 whole that is PP uptake
Tray 511D- 2	filter N	1	5.73547	0.652671	154562	36.3837		0.571924		SOG12-2	1c whole	100	0.652671	0.00652671	0.00370853	3.70853		adj 1 whole
Tray 511D- 3	filter O	1	5.348	0.608656	88169.5	24.6893		0.327832		SOG12-2	1c filt	150	0.608656	0.00405771	0.00131517	1.31517
																		SW+Lys	1.67499	1.76598	3.98026	4.3409	= removing bacterial uptake
Tray 408E- 1	glycine	0.448	55.0592	6.25573	10.7836	0.370239	Run on separate day											SW	0.00650305	0.00510538	0.00256244	0.00425028
Tray 408E- 2	glycine	0.274	32.9974	3.74956	10.4622	0.370121
Tray 511C- 4	filter AJ	1	12.2498	1.39268	43889.2	14.1657		0.165035		CHNR	6c	50	1.39268	0.0278536	0.00449332	4.49332		SW+Lys	1.66848	1.76088	3.9777	4.33665	= subtracting out the control
Tray 511D- 4	filter R	1	4.9937	0.568408	255.049	0.4593		0.00461419		SOG12-2	2c whole	100	0.568408	0.00568408	5.10538e-06	0.00510538
Tray 511D- 5	filter E	1	9.10693	1.03566	94976.8	26.0825		0.352859		SOG12-1	1c whole	100	1.03566	0.0103566	0.00361594	3.61594
Tray 511D- 6	filter F	1	8.39439	0.954719	71590.9	21.066		0.266881		SOG12-1	1c filt	150	0.954719	0.00636479	0.00167499	1.67499			Saanich Inlet	Fraser River Plume	Gorge Harbour
Tray 511D- 7	filter I	1	7.89404	0.897881	207.743	0.442064		0.00444027		SOG12-1	2c whole	100	0.897881	0.00897881	6.50305e-06	0.00650305		SW+Lys	1.66848	1.76088	4.15717	uM 15-N taken up
Tray 511D- 8	peptone	0.285	29.3487	3.33508	12.8281	0.370985	carryover from highly enriched samples											Range			0.360633
																		So there is a definite signal of lysate being used by PP for CHN-SW.
											Fold decrease in PP after filtration
												SI	FRP	QCS
											1a		5.27242	3.76022
											1b	7.25335	9.19471	4.38146
											1c	0.54773	1.34278	10.1302
											Filtered N-15 numbers are the amount of N-15 taken up by phytoplankton alone, but a smaller amount of PP.
											Unfiltered N-15 is the amount of N-15 taken up by full numbers of PP and by bacteria, together.
											So, two ways: either calculate a per cell uptake in filtered, then multiply by unfiltered PP numbers. Or,
											multiply N-15 value by fold decrease to get expected N-15 uptake by phytoplankton alone
											Potential amount of Lys caught on filters
												ml filtered	umol on filter
											Lys	10	1.27705
											1c	50	2.10414
											3c	50	1.79099
											6c	50	1.39268
											Treat ave		1.7626
											Maximum amount of Lys in treatments (after dilution)
											Lys added		10	ml
											Total volume		200	ml
											Max Lys through filter		2.5	ml
											Amount of lysate filtered in control (Lys) equivalent to the maximum amount of lysate in treatments
											Lys	0.319263	umol
											Percentage	18.1132
